# Supplementary material for: Reactivity study of Lewis superacidic carborane-based analogue of 9-bromo-9-borafluorene towards Lewis bases
Source: Royal Society of Chemistry journal article supplement (doi:10.1039/d4dt01615g), 2024-01-01
Supplement: d4dt01615g1.pdf [file d4dt01615g1.pdf]

## Supporting Information

### **Reactivity study of Lewis superacidic carborane-based analogue of 9-bromo-9-borafluorene towards Lewis bases**

Libo Xiang,<sup>a,b</sup> Alexander Matler,<sup>a,b</sup> Leibo Tan,<sup>a,b</sup> Qing Ye<sup>\*a,b</sup>

<sup>a</sup> *Institute for Inorganic Chemistry, Julius-Maximilians-Universität Würzburg, Am Hubland, 97074 Würzburg (Germany)*

<sup>b</sup> *Institute for Sustainable Chemistry & Catalysis with Boron  
Julius-Maximilians-Universität Würzburg  
Am Hubland, 97074 Würzburg (Germany)*

*E-mail: qing.ye@uni-wuerzburg.de*

## Contents

|                                     |    |
|-------------------------------------|----|
| Contents .....                      | 2  |
| Experimental procedures .....       | 3  |
| Synthesis and characterization..... | 4  |
| NMR Spectroscopy .....              | 8  |
| Crystallographic Details.....       | 27 |
| Reference .....                     | 32 |

## Experimental procedures

### General remarks

Unless otherwise noted, the following conditions apply.

All the manipulations were carried out using standard schlenk lines or glovebox under an argon atmosphere. All the solvents were dried following standard techniques. Deuterated benzene was distilled from Na/K and stored under an argon atmosphere before use.  $\text{Ph}_3\text{P}$ ,  $\text{Cy}_3\text{P}$ ,  $\text{Et}_3\text{P}$  and  $^t\text{BuNC}$  were purchased from commercial sources and used without further purification.  $(\text{C}_2\text{B}_{10}\text{H}_{10})_2\text{BBr}$  (**1**)<sup>1</sup>,  $\text{MeI/Pr}^2$ , and  $\text{MesNC}^3$  were synthesized according to the literature. Other reagents were used as received without further purification.

The nuclear magnetic resonance spectroscopy was recorded on a Bruker Avance-400 ( $^1\text{H}$  400.1 MHz;  $^{11}\text{B}$  128.5 MHz;  $^{13}\text{C}$  101 MHz;  $^{31}\text{P}$ : 162. MHz) spectrometer at room temperature.  $^{11}\text{B}$  NMR,  $^{11}\text{B}\{^1\text{H}\}$  spectra were referenced relative to 15%  $\text{BF}_3\cdot\text{OEt}_2$ .  $^{31}\text{P}\{^1\text{H}\}$  NMR chemical shifts are relative to 85%  $\text{H}_3\text{PO}_4$ . High-resolution mass spectrometry (HRMS) was performed with a Thermo Fisher Scientific Q-Exactive MS System. Elemental analysis (C, H, N) was performed on a vario micro cube CHNS analyzer.

## Synthesis and characterization

### Synthetic protocols for **2**

The 1 mL toluene solution of phosphines ligands (0.32 mmol) was slowly added to a solution of **1** (106 mg, 0.32 mmol) in 5 mL hexane at  $-78$  °C. The reaction mixture was allowed to gradually warm to room temperature for a period of 4 h. The precipitate was collected through filtration and washed with hexane (3\*2 mL). The remaining solid was dried under high vacuum to give the crude product as a white solid. The analytically pure product was crystallized from concentrated toluene solution at  $-30$  °C for 12 h to yield **2** as a colorless crystalline solid.

For **2a**:

$^1\text{H NMR}$  (400 MHz,  $\text{C}_6\text{D}_6$ ):  $\delta$  [ppm] = 1.88 to 3.78 (m, 20H, BH), 6.72 to 6.77 (m, 2H, H of Ph), 6.86 to 6.96 (m, 7H, H of Ph), 7.36 to 7.42 (m, 2H, H of Ph), 7.90 to 7.95 (m, 4H, H of Ph).  $^1\text{H}\{^{11}\text{B}\}$  NMR (400 MHz,  $\text{C}_6\text{D}_6$ ):  $\delta$  [ppm] = 2.26 (s, 2H, BH), 2.61 (s, 8H, BH), 2.85 (s, 3H, BH), 3.04 (s, 5H, BH), 4.08 (s, 2H, BH), 6.72 to 6.78 (m, 2H, H of Ph), 6.87 to 6.96 (m, 7H, H of Ph), 7.37 to 7.42 (m, 2H, H of Ph), 7.90 to 7.95 (m, 4H, H of Ph).  $^{11}\text{B NMR}$  (128 MHz,  $\text{C}_6\text{D}_6$ ):  $\delta$  [ppm] = 1.09 (d,  $J = 145.3$  Hz,  $B_{\text{carborane}}$ ),  $-3.87$  (d,  $J = 156.4$  Hz,  $B_{\text{carborane}}$ ),  $-7.00$  to  $-10.70$  (m,  $B_{\text{carborane}}$ ).  $^{11}\text{B}\{^1\text{H}\}$  NMR (128 MHz,  $\text{C}_6\text{D}_6$ ):  $\delta$  [ppm] = 1.06 (s,  $B_{\text{carborane}}$ ),  $-3.85$  (s,  $C_{\text{carbeneB}}$ ),  $-6.15$  (s,  $B_{\text{carborane}}$ ),  $-7.39$  (s,  $B_{\text{carborane}}$ ),  $-10.18$  (s,  $B_{\text{carborane}}$ ).  $^{31}\text{P}\{^1\text{H}\}$  NMR (162 MHz,  $\text{C}_6\text{D}_6$ ):  $\delta$  [ppm] = 4.14 (q,  $J = 125.8$  Hz).  $^{13}\text{C}\{^1\text{H}\}$  NMR (100 MHz,  $\text{C}_6\text{D}_6$ ):  $\delta$  [ppm] = 80.8 (s,  $C_{\text{carborane}}$ ), 121.4 (d,  $J_{\text{P-C}} = 57.6$  Hz, C of Ph), 124.1 (d,  $J_{\text{P-C}} = 68.3$  Hz, C of Ph), 128.2 (d,  $J_{\text{P-C}} = 10.9$  Hz, C of Ph), 128.7 (d,  $J_{\text{P-C}} = 11.2$  Hz, C of Ph), 132.7 (d,  $J_{\text{P-C}} = 2.9$  Hz, C of Ph), 133.2 (d,  $J_{\text{P-C}} = 3.0$  Hz, C of Ph), 134.7 (d,  $J_{\text{P-C}} = 8.6$  Hz, C of Ph), 135.7 (d,  $J_{\text{P-C}} = 9.3$  Hz, C of Ph). **Elemental analysis**: calcd. for  $\text{C}_{22}\text{H}_{35}\text{B}_{21}\text{BrP}$ , C, 41.46; H, 5.53; found C, 41.59; H, 5.84. Yield: 78 % (150.9 mg, 0.25 mmol).

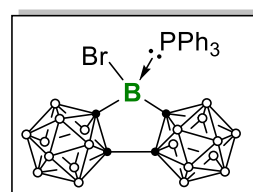

For **2b**:

$^1\text{H NMR}$  (400 MHz,  $\text{C}_6\text{D}_6$ ):  $\delta$  [ppm] = 1.29 to 1.52 (m, 12H, H of Cy), 1.78 to 2.07 (m, 22H, H of Cy), 2.18 to 3.96 (m, 20H, BH).  $^1\text{H}\{^{11}\text{B}\}$  NMR (400 MHz,  $\text{C}_6\text{D}_6$ ):  $\delta$  [ppm] = 1.26 to 1.52 (m, 12H, H of Cy), 1.78 to 1.20 (m, 21H, H of Cy), 2.28 to 2.48 (s, 17H, BH), 2.72 to 2.80 (s, 1H, BH), 3.22 (s, 1H, BH), 3.61 (s, 1H, BH).  $^{11}\text{B NMR}$  (128 MHz,  $\text{C}_6\text{D}_6$ ):  $\delta$  [ppm] = 0.50 (d,  $J = 130.8$  Hz,  $B_{\text{carborane}}$ ),  $-5.37$  to  $-8.29$  (m,  $B_{\text{carborane}}$ ).  $^{11}\text{B}\{^1\text{H}\}$  NMR (128 MHz,  $\text{C}_6\text{D}_6$ ):  $\delta$  [ppm] = 0.42 (s,  $B_{\text{carborane}}$ ),  $-4.61$  (s,  $C_{\text{carbeneB}}$ ),  $-5.31$  (s,  $B_{\text{carborane}}$ ),  $-6.38$  (s,  $B_{\text{carborane}}$ ),  $-7.89$  (s,  $B_{\text{carborane}}$ ),  $-10.32$  (s,  $B_{\text{carborane}}$ ).  $^{31}\text{P}\{^1\text{H}\}$  NMR (162 MHz,  $\text{C}_6\text{D}_6$ ):  $\delta$  [ppm] = 8.8 (q,  $J = 140.3$  Hz).  $^{13}\text{C}\{^1\text{H}\}$  NMR (100 MHz,  $\text{C}_6\text{D}_6$ ):  $\delta$  [ppm] = 25.6 (d,  $J_{\text{P-C}} = 1.3$  Hz, C of Cy), 25.8 (d,  $J_{\text{P-C}} = 1.3$  Hz, C of Cy), 26.9 (d,  $J_{\text{P-C}} = 11.5$  Hz, C of Cy), 27.6 (d,  $J_{\text{P-C}} = 10.5$  Hz, C of Cy), 27.9 (d,  $J_{\text{P-C}} = 9.6$  Hz, C of Cy), 28.6 (d,  $J_{\text{P-C}} = 2.1$  Hz, C of Cy),

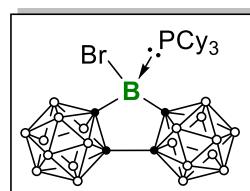

29.6 (d,  $J_{P-C} = 5.6$  Hz. C of Cy), 29.7 (d,  $J_{P-C} = 4.6$  Hz. C of Cy), 32.2 (d,  $J_{P-C} = 23.1$  Hz. C of Cy), 35.1 (d,  $J_{P-C} = 30.1$  Hz. C of Cy), 80.7 (s,  $C_{\text{carborane}}$ ). **HRMS:**  $[M-Br]^+$  calcd. for  $C_{22}B_{21}H_{53}P$ , 575.5984; found 575.5960. Yield: 86 % (180.1 mg, 0.27 mmol).

For **2c**:

**$^1H$  NMR** (400 MHz,  $C_6D_6$ ):  $\delta$  [ppm] = 0.44 to 0.51 (m, 9H, H of  $CH_2CH_3$ ), 1.54 (quintet,  $J = 8.5$  Hz, 6H,  $CH_2CH_3$ ), 2.11 to 3.77 (br. m, 20H, BH).

**$^1H\{^{11}B\}$  NMR** (400 MHz,  $C_6D_6$ ):  $\delta$  [ppm] = 0.44 to 0.52 (m, 9H,  $CH_2CH_3$ ), 1.54 (quintet,  $J = 8.4$  Hz, 6H,  $CH_2CH_3$ ), 2.18 (s, 2H, BH), 2.63 (s, 2H, BH), 2.74 (s, 4H, BH), 2.80 (s, 2H, BH), 2.89 (s, 2H, BH), 3.00 (s, 2H, BH), 3.06

(s, 4H, BH), 3.84 (s, 2H, BH).  **$^{11}B$  NMR** (128 MHz,  $C_6D_6$ ):  $\delta$  [ppm] = 0.49 (d.  $J = 149.9$  Hz,  $B_{\text{carborane}}$ ),  $-3.87$  (d.  $J = 149.7$  Hz,  $B_{\text{carborane}}$ ),  $-5.35$  to  $-10.99$  (m,  $B_{\text{carborane}}$ ).  **$^{11}B\{^1H\}$  NMR** (128 MHz,  $C_6D_6$ ):  $\delta$  [ppm] = 0.30 (s,  $B_{\text{carborane}}$ ),  $-4.03$  (s,  $C_{\text{carbeneB}}$ ),  $-5.97$  (s,  $B_{\text{carborane}}$ ),  $-7.61$  (s,  $B_{\text{carborane}}$ ),  $-10.50$  (s,  $B_{\text{carborane}}$ ).  **$^{31}P\{^1H\}$  NMR** (162 MHz,  $C_6D_6$ ):  $\delta$  [ppm] = 1.5 (q.  $J = 123.0$  Hz).  **$^{13}C\{^1H\}$  NMR** (100 MHz,  $C_6D_6$ ):  $\delta$  [ppm] = 7.5 (d,  $J_{P-C} = 6.6$  Hz.  $CH_2CH_3$ ), 13.9 (d,  $J_{P-C} = 38.3$  Hz.  $CH_2CH_3$ ), 80.9 (s). **HRMS:**  $[M-Br]^+$  calcd. for  $C_{10}B_{21}H_{35}P$ , 413.4576; found 413.4565. Yield: 81 % (127.6 mg, 0.26 mmol).

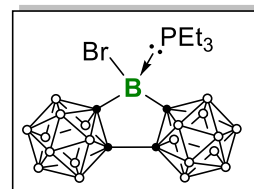

### Synthetic protocols for **3**

The 1 mL toluene solution of isocyanide (0.32 mmol) was slowly added to a solution of **1** (106 mg, 0.32 mmol) in 5 mL hexane at  $-78$  °C. The reaction mixture was allowed to gradually warm to room temperature for a period of 4 h. The precipitate was collected through filtration and washed with hexane (3\*2 mL). The remaining solid was dried under high vacuum to give the crude product as a white solid. The analytically pure product was crystallized from concentrated toluene solution at  $-30$  °C for 12 h to yield crystalline solids.

For **3a**:

**$^1H$  NMR** (400 MHz,  $C_6D_6$ ):  $\delta$  [ppm] = 1.75 (s, 3H,  $CCH_3$ ), 1.78 (s, 6H,  $CCH_3$ ), 2.13 to 3.63 (br. m, 20H, BH), 6.10 (s, 2H, H of Ar).  **$^1H\{^{11}B\}$  NMR** (400 MHz,  $C_6D_6$ ):  $\delta$  [ppm] = 1.75 (s, 3H,  $CCH_3$ ), 1.79 (s, 6H,  $CCH_3$ ), 2.49 (s, 2H, BH), 2.69 (s, 4H, BH), 2.87 (s, 2H, BH), 2.98 (s, 6H, BH), 3.06 (s, 2H,  $NCH_3$ ), 3.39 (s, 2H, BH), 3.70 (s, 2H, BH).  **$^{11}B$  NMR** (128 MHz,  $C_6D_6$ ):  $\delta$  [ppm] = 0.11 (d.  $J = 157.6$  Hz,  $B_{\text{carborane}}$ ),  $-3.40$  (d.  $J = 158.0$  Hz,  $B_{\text{carborane}}$ ),  $-6.18$  to  $-11.62$  (m,  $B_{\text{carborane}}$ ),  $-12.84$  (s,  $C_{\text{isocyanideB}}$ ).  **$^{11}B\{^1H\}$  NMR** (128 MHz,

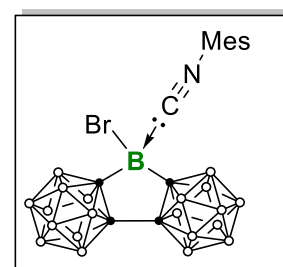

$C_6D_6$ ):  $\delta$  [ppm] = 0.08 (s,  $B_{\text{carborane}}$ ),  $-3.43$  (s,  $C_{\text{isocyanideB}}$ ),  $-6.61$  (s,  $B_{\text{carborane}}$ ),  $-9.13$  (s,  $B_{\text{carborane}}$ ),  $-11.00$  (s,  $B_{\text{carborane}}$ ),  $-12.85$  (s,  $C_{\text{isocyanideB}}$ ).  **$^{13}C\{^1H\}$  NMR** (100 MHz,  $C_6D_6$ ):  $\delta$  [ppm] = 17.5 (s,  $CCH_3$ ), 20.7 (s,  $CCH_3$ ), 80.7 (s,  $C_{\text{carborane}}$ ), 129.1 (s, C of Ar), 137.4 (s, C of Ar), 144.1 (s, C of Ar). **HRMS (LIFDI):** calcd. for  $C_{14}B_{21}H_{31}BrN$ , 519.3739; found 519.3736. Yield: 76 % (125.8 mg, 0.24 mmol).

For **3b**:

$^1\text{H NMR}$  (400 MHz,  $\text{C}_6\text{D}_6$ ):  $\delta$  [ppm] = 0.45 (s, 9H,  $\text{C}(\text{CH}_3)_3$ ), 2.11 to 3.77 (br. m, 20H, BH).  $^1\text{H}\{^{11}\text{B}\}$  NMR (400 MHz,  $\text{C}_6\text{D}_6$ ):  $\delta$  [ppm] = 0.46 (s, 9H,  $\text{C}(\text{CH}_3)_3$ ), 2.35 (s, 2H, BH), 2.67 (s, 4H, BH), 2.86 (s, 2H, BH), 2.94 (s, 2H, BH), 3.05 (s, 6H, BH), 3.15 (s, 2H,  $\text{NCH}_3$ ), 3.62 (s, 2H, BH).  $^{11}\text{B NMR}$  (128 MHz,  $\text{C}_6\text{D}_6$ ):  $\delta$  [ppm] = 0.04 (d.  $J = 146.6$  Hz,  $B_{\text{carborane}}$ ),  $-3.44$  (d.  $J = 153.5$  Hz,  $B_{\text{isocyanide}}$ ),  $-6.25$  to  $-10.04$  (m,  $B_{\text{carborane}}$ ),  $-13.88$  (s,  $B_{\text{isocyanide}}$ ).  $^{11}\text{B}\{^1\text{H}\}$  NMR (128 MHz,  $\text{C}_6\text{D}_6$ ):  $\delta$  [ppm] =  $-0.19$  (s,  $B_{\text{carborane}}$ ),  $-3.68$  (s,  $B_{\text{isocyanide}}$ ),  $-6.97$  (s,  $B_{\text{carborane}}$ ),  $-9.43$  (s,  $B_{\text{carborane}}$ ),  $-11.43$  (s,  $B_{\text{carborane}}$ ),  $-13.96$  (s,  $B_{\text{isocyanide}}$ ).  $^{13}\text{C}\{^1\text{H}\}$  NMR (100 MHz,  $\text{C}_6\text{D}_6$ ):  $\delta$  [ppm] = 27.2 (s,  $\text{C}(\text{CH}_3)_3$ ), 62.1 (s,  $\text{C}(\text{CH}_3)_3$ ), 80.7 (s,  $C_{\text{carborane}}$ ). HRMS  $[\text{M}-\text{Br}]^+$  calcd. for  $\text{C}_9\text{B}_{21}\text{H}_{29}\text{N}$ , 378.4399; found 378.4394. Yield: 87 % (127.3 mg, 0.28 mmol).

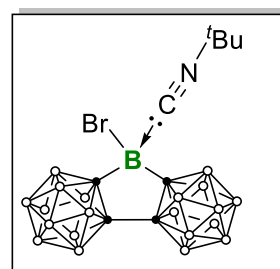

### Synthesis of **4**

Path A: In an argon-filled glove box,  $^{\text{Me}}\text{iPr}$  (60 mg, 0.32 mmol) was added to a solution of **1** (106 mg, 0.32 mmol) in toluene (5 mL). The reaction mixture was stirred at room temperature, leading to an immediate color change to orange. The orange suspension was further stirred at room temperature for 12 h, then all volatiles were removed under high vacuum. The obtained solid was washed with hexane (3\*2 mL). The remaining solid was extracted with 2 mL toluene. The toluene solution was concentrated and stored at  $-30$  °C for 12 h to yield **4** an orange crystalline solid.

$^1\text{H NMR}$  (400 MHz,  $\text{C}_6\text{D}_6$ ):  $\delta$  [ppm] = 0.84 (d,  $J = 6.4$  Hz, 3H,  $\text{CH}(\text{CH}_3)_2$ ), 0.99 (d,  $J = 6.9$  Hz, 3H,  $\text{CH}(\text{CH}_3)_2$ ), 1.07 (d,  $J = 7.0$  Hz, 3H,  $\text{CH}(\text{CH}_3)_2$ ), 1.18 (s, 3H,  $\text{CCH}_3$ ), 1.33 (dd,  $J = 14.5, 7.8$  Hz, 1H,  $\text{BCH}_2\text{CH}$ ), 1.42 (s, 3H,  $\text{CCH}_3$ ), 1.89 (dd,  $J = 14.8, 7.7$  Hz, 1H,  $\text{BCH}_2\text{CH}$ ), 3.67 (sept,  $J = 6.8$  Hz, 1H,  $\text{CH}(\text{CH}_3)_2$ ), 4.98 (sept,  $J = 6.8$  Hz, 1H,  $\text{CHCH}_3$ ).  $^1\text{H}\{^{11}\text{B}\}$  NMR (400 MHz,  $\text{C}_6\text{D}_6$ ):  $\delta$  [ppm] = 0.85 (d,  $J = 6.4$  Hz, 3H,  $\text{CH}(\text{CH}_3)_2$ ), 1.00 (d,  $J = 6.9$  Hz, 3H,  $\text{CH}(\text{CH}_3)_2$ ), 1.08 (d,  $J = 7.0$  Hz, 3H,  $\text{CH}(\text{CH}_3)_2$ ), 1.19 (s, 3H,  $\text{CCH}_3$ ), 1.33 (dd,  $J = 14.4, 6.7$  Hz, 1H,  $\text{BCH}_2\text{CH}$ ), 1.42 (s, 3H,  $\text{CCH}_3$ ), 1.89 (dd,  $J = 14.3, 7.9$  Hz, 1H,  $\text{BCH}_2\text{CH}$ ), 2.25 (s, 1H, BH), 2.45 (s, 1H, BH), 2.61 (s, 1H, BH), 2.84 to 3.09 (m, 14H, BH), 3.36 (s, 1H, BH), 3.50 (s, 2H, BH), 3.66 (sept,  $J = 6.8$  Hz, 1H,  $\text{CH}(\text{CH}_3)_2$ ), 4.98 (sept,  $J = 6.8$  Hz, 1H,  $\text{CHCH}_3$ ).  $^{11}\text{B NMR}$  (128 MHz,  $\text{C}_6\text{D}_6$ ):  $\delta$  [ppm] =  $-0.96$  (d.  $J = 128.1$  Hz,  $B_{\text{carborane}}$ ),  $-3.87$  (d.  $J = 171.3$  Hz,  $B_{\text{carborane}}$ ),  $-6.11$  to  $-7.04$  (m,  $B_{\text{carborane}}$ ),  $-8.03$  (s,  $\text{CH}_2\text{B}$ ),  $-9.57$  (s,  $B_{\text{carborane}}$ ).  $^{11}\text{B}\{^1\text{H}\}$  NMR (128 MHz,  $\text{C}_6\text{D}_6$ ):  $\delta$  [ppm] =  $-1.26$  (s,  $B_{\text{carbene}}$ ),  $-4.19$  (s,  $B_{\text{carborane}}$ ),  $-7.31$  (s,  $B_{\text{carborane}}$ ),  $-8.11$  (s,  $\text{CH}_2\text{B}$ ),  $-9.40$  (s,  $B_{\text{carborane}}$ ).  $^3\text{C}\{^1\text{H}\}$  NMR (100 MHz,  $\text{C}_6\text{D}_6$ ):  $\delta$  [ppm] = 7.9 (s,  $\text{C}(\text{CH}_3)$ ), 9.9 (s,  $\text{C}(\text{CH}_3)$ ), 21.0 (s,  $\text{CH}(\text{CH}_3)$ ), 21.3 (s,  $\text{C}(\text{CH}_3)$ ), 22.8 (s,  $\text{C}(\text{CH}_3)$ ), 38.1 (br, s,  $\text{BCH}_2$ ), 50.75 (s,  $\text{CH}(\text{CH}_3)_2$ ), 54.2 (s,  $\text{CHCH}_3$ ), 80.6 (s,  $C_{\text{carborane}}$ ), 128.2 (s,  $\text{CCH}_3$ ) HRMS (LIFDI): calc. for  $\text{C}_{15}\text{B}_{21}\text{N}_2\text{H}_{39}$ , 474.5213; found 474.5207. Yield: 34 % (51.6 mg, 0.11 mmol).

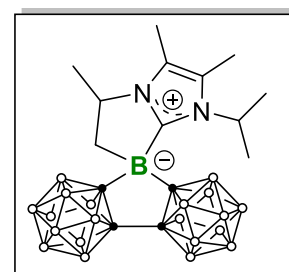

Path B: In an argon-filled glove box, a 1 mL benzene solution of  $^{Me}I/Pr$  (30 mg, 0.16 mmol) was dropwise added to a 3 mL benzene solution of **1** (106 mg, 0.32 mmol). The reaction mixture was stirred for 10 min to afford a yellowish-green solid **5**. Then added  $^{Me}I/Pr$  (30 mg, 0.16 mmol) dropwise to it and stir overnight as the color of the solution changes to orange. The **5** was obtained after the removal of all volatiles under high vacuum.

Note: **5** decomposes in  $CDCl_3$  and  $CD_2Cl_2$ . Therefore, NMR spectra of **5** were acquired in  $C_6D_6$  despite its poor solubility in  $C_6D_6$ . As a consequence, the NMR signals are weak and some of the signals were not observed.

$^1H$  NMR (500 MHz,  $C_6D_6$ ):  $\delta$  [ppm] = 0.74 (d,  $J$  = 6.7 Hz, 12H,  $CH(CH_3)_2$ ), 1.28 (s, 6H,  $CH_3$ ), 3.27 (sept,  $J$  = 6.8 Hz,  $CH(CH_3)_2$ ), 2.06 to 3.44 (br. m, BH).

$^{11}B$  NMR (160 MHz,  $C_6D_6$ ):  $\delta$  [ppm] = -0.25 (s),

-3.71 (d,  $J$  = 142.5 Hz,  $B_{carborane}$ ), -5.33 to

-8.15 (m,  $B_{carborane}$ ).  $^{11}B\{^1H\}$  NMR (160 MHz,

$C_6D_6$ ):  $\delta$  [ppm] = -0.26 (s), -3.87 (s,  $B_{carborane}$ ),

-7.30 (m,  $B_{carborane}$ ).  $^{13}C\{^1H\}$  NMR (125 MHz,

$C_6D_6$ ):  $\delta$  [ppm] = 7.4 (s,  $CH_3$ ), 21.6 (s,  $CH_3$ ), 50.2

(s,  $CHCH_3$ ), 80.4 (s,  $C_{carborane}$ ), 128.0 (s,  $CCH_3$ )

HRMS (m/z):  $[M]^+$  calcd. for  $C_{15}H_{40}B_{21}N_2$ , 479.5146; found 479.5140. Yield: 69 % (112.4 mg, 0.12 mmol).

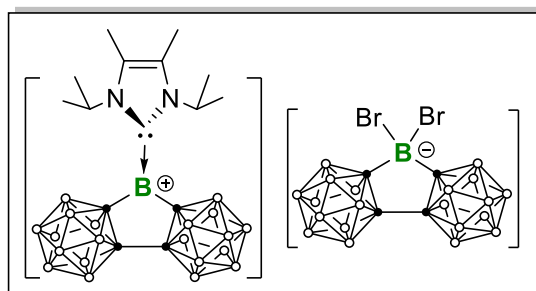

# NMR Spectroscopy

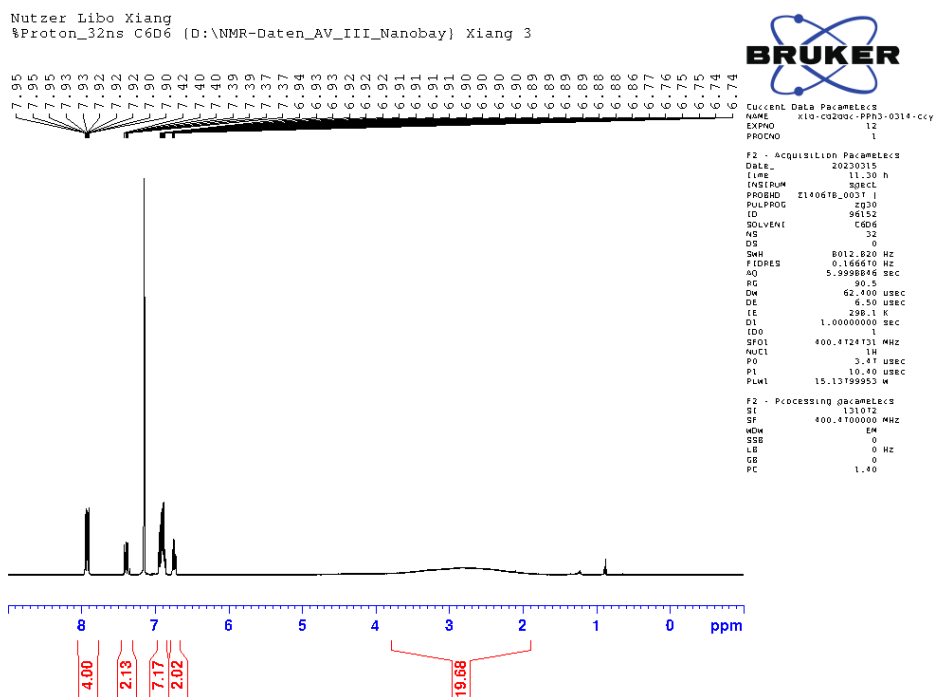

Figure S1.  $^1\text{H}$  NMR spectra of **2a** in  $\text{C}_6\text{D}_6$  at 298 K.

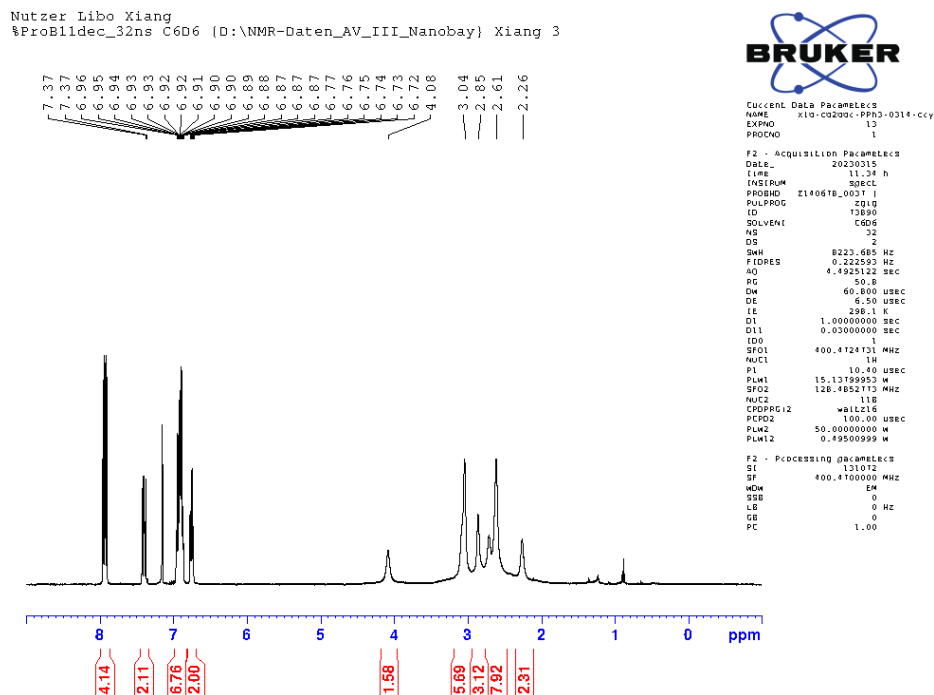

Figure S2.  $^1\text{H}\{^{11}\text{B}\}$  NMR spectra of **2a** in  $\text{C}_6\text{D}_6$  at 298 K.





Nutzer Libo Xiang  
 %P31\_CPD\_128ns C6D6 [D:\NMR-Daten\_AV\_III\_Nanobay] Xiang 3

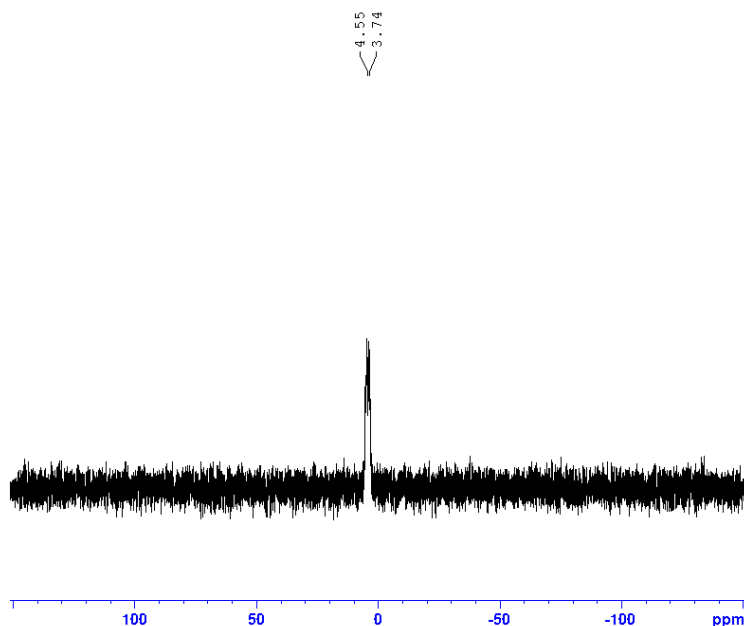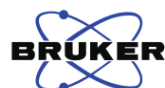

```

Current Data Parameters
NAME      x10-c0290c-pp3-0314-ccy
EXPNO    15
PROCNO   1

F2 - Acquisition Parameters
Date_    20230315
Time     11:45 h
INSTRUM  spect
PROBHD   z14061b_0031.j
PULPROG  zgpg30
ID        192302
SOLVENT  C6D6
NS        128
DS        4
SWH       49019.609 Hz
FIDRES   0.509819 Hz
AQ        1.9614808 sec
RG        203
DM        10.200 usec
DE        6.50 usec
TE        298.1 K
D1        2.00000000 sec
D11       0.03000000 sec
D12       0.03000000 sec
D13       0.03000000 sec
SFO1      162.1132215 MHz
NUC1      31P
P0        2.61 usec
P1        6.00 usec
PLW1      46.62900162 W
SFO2      400.411019 MHz
NUC2      1H
CPDPRG12 waltz16
PCPD2     90.00 usec
PLW2      15.13199853 W
PLW12     0.20215000 W
PLW13     0.10167000 W

F2 - Processing Parameters
SI        262144
SF        162.1132215 MHz
WDW       EM
SSB       0
LB        4.00 Hz
GB        0
PC        1.40
  
```

Figure S5.  $^{31}\text{P}\{^1\text{H}\}$  NMR spectrum of **2a** in  $\text{C}_6\text{D}_6$  at 298 K.

Nutzer Libo Xiang  
 %C13\_CPD C6D6 [D:\NMR-Daten\_AV\_III\_Nanobay] Xiang 3

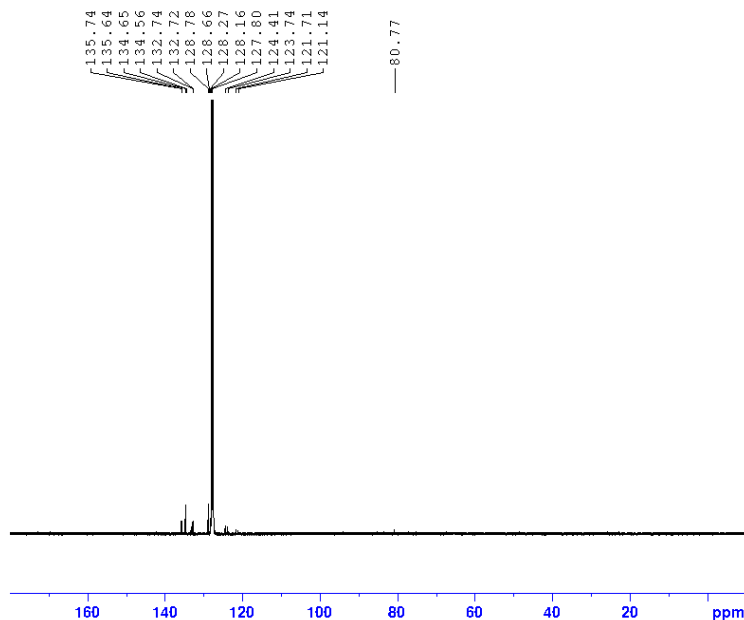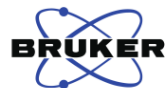

```

Current Data Parameters
NAME      x10-c0290c-pp3-0314-ccy
EXPNO    15
PROCNO   1

F2 - Acquisition Parameters
Date_    20230315
Time     14:29 h
INSTRUM  spect
PROBHD   z14061b_0031.j
PULPROG  zgpg30
ID        65536
SOLVENT  C6D6
NS        3000
DS        4
SWH       21111.111 Hz
FIDRES   0.847110 Hz
AQ        1.1198480 sec
RG        203
DM        10.000 usec
DE        6.50 usec
TE        298.1 K
D1        2.00000000 sec
D11       0.03000000 sec
D12       0.03000000 sec
D13       0.03000000 sec
SFO1      100.1102454 MHz
NUC1      13C
P0        3.33 usec
P1        10.00 usec
PLW1      62.21199936 W
SFO2      400.411019 MHz
NUC2      1H
CPDPRG12 waltz16
PCPD2     90.00 usec
PLW2      15.13199853 W
PLW12     0.20215000 W
PLW13     0.10167000 W

F2 - Processing Parameters
SI        131072
SF        100.6084615 MHz
WDW       EM
SSB       0
LB        0.60 Hz
GB        0
PC        1.40
  
```

Figure S6.  $^{13}\text{C}\{^1\text{H}\}$  NMR spectra of **2a** in  $\text{C}_6\text{D}_6$  at 298 K.

Nutzer Libo Xiang  
 %Proton\_32ns CDCl3 (D:\NMR-Daten\_AV\_III\_Nanobay) Xiang 52

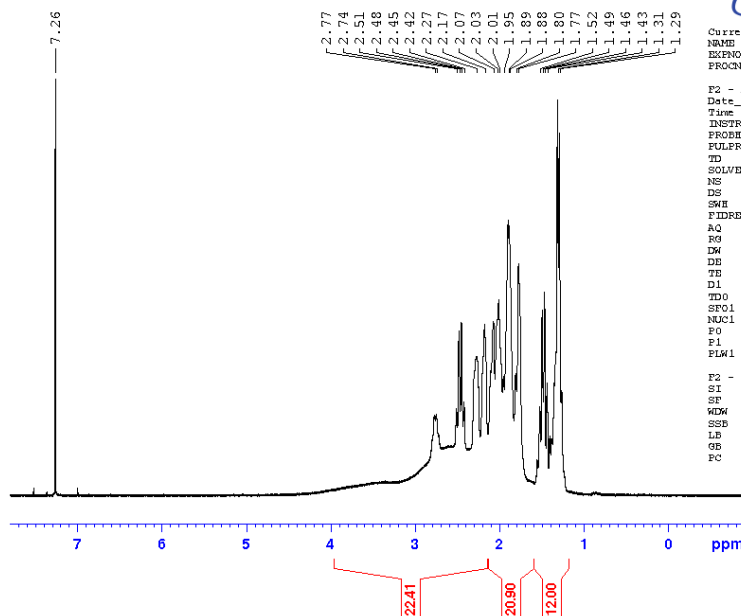

Figure S7. <sup>1</sup>H NMR spectra of **2b** in C<sub>6</sub>D<sub>6</sub> at 298 K.

Nutzer Libo Xiang  
 %ProB11dec\_32ns CDCl3 (D:\NMR-Daten\_AV\_III\_Nanobay) Xiang 52

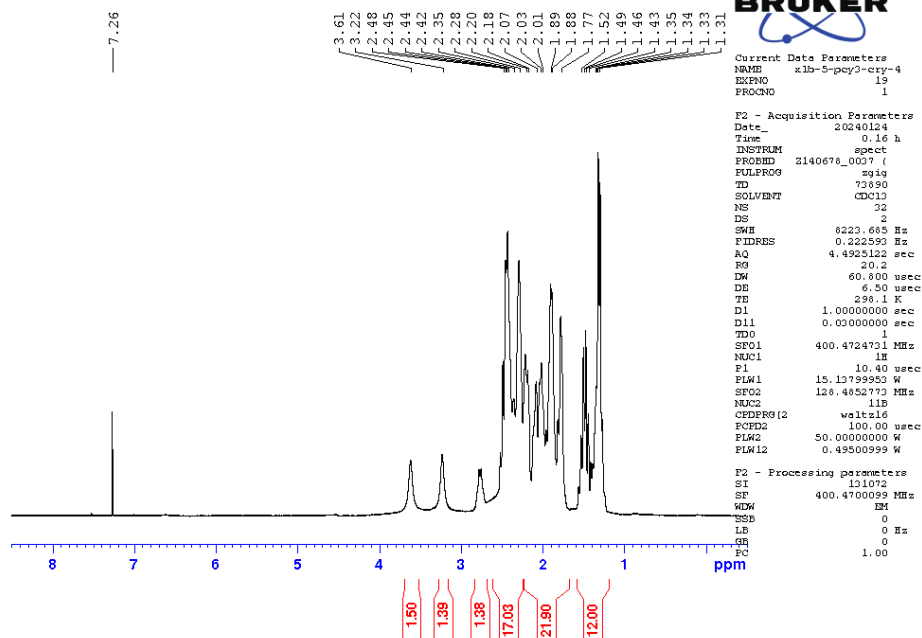

Figure S8. <sup>1</sup>H{<sup>13</sup>B} NMR spectra of **2b** in C<sub>6</sub>D<sub>6</sub> at 298 K.

Nutzer Libo Xiang  
 %B11\_ZG\_256ns CDC13 (D:\NMR-Daten\_AV\_III\_Nanobay) Xiang 52

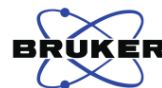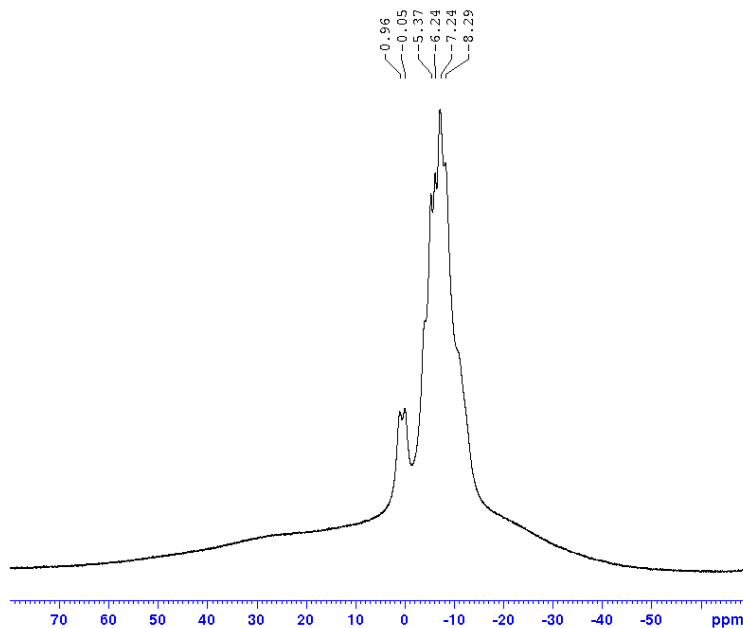

Current Data Parameters  
 NAME xlb-5-pcy3-cry-4  
 EXPNO 17  
 PROCNO 1

F2 - Acquisition Parameters  
 Date\_ 20240124  
 Time 0.06 h  
 INSTRUM spect  
 PROBHD Z140678\_0037 (4  
 PULPROG zgpg  
 TD 20190  
 SOLVENT CDC13  
 NS 256  
 DS 0  
 SWH 25510.203 Hz  
 FIDRES 2.527014 Hz  
 AQ 0.3957240 sec  
 RG 200  
 DW 19.600 usec  
 DE 6.50 usec  
 TE 298.1 K  
 D1 1.00000000 sec  
 TD0 1  
 SF01 128.4905453 MHz  
 NUC1 11B  
 P1 9.95 usec  
 PLW1 50.00000000 W

F2 - Processing parameters  
 SI 32768  
 SF 128.4866907 MHz  
 WDW EM  
 SSB 0  
 LB 3.00 Hz  
 GB 0  
 PC 1.40

Figure S9.  $^{11}\text{B}$  NMR spectra of **2b** in  $\text{C}_6\text{D}_6$  at 298 K.

Nutzer Libo Xiang  
 %B11\_CPD\_128ns CDC13 (D:\NMR-Daten\_AV\_III\_Nanobay) Xiang 52

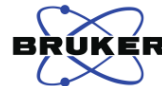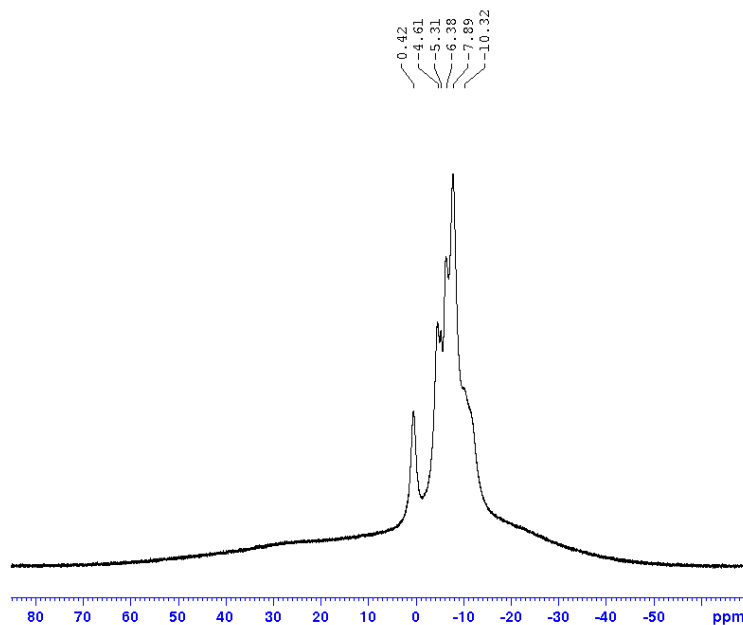

Current Data Parameters  
 NAME xlb-5-pcy3-cry-4  
 EXPNO 13  
 PROCNO 1

F2 - Acquisition Parameters  
 Date\_ 20240124  
 Time 0 h  
 INSTRUM spect  
 PROBHD Z140678\_0037 (4  
 PULPROG zgpg  
 TD 20190  
 SOLVENT CDC13  
 NS 128  
 DS 0  
 SWH 25510.203 Hz  
 FIDRES 2.527014 Hz  
 AQ 0.3957240 sec  
 RG 200  
 DW 19.600 usec  
 DE 6.50 usec  
 TE 298.1 K  
 D1 1.00000000 sec  
 D11 0.03000000 sec  
 TD0 1  
 SF01 128.4905453 MHz  
 NUC1 11B  
 P1 9.95 usec  
 PLW1 50.00000000 W  
 SF02 400.4720024 MHz  
 NUC2 1H  
 CPDPRG2 waltz16  
 PCPD2 90.00 usec  
 PLW2 15.13799953 W  
 PLW12 0.20214000 W  
 PLW13 0.10167000 W

F2 - Processing parameters  
 SI 65536  
 SF 128.4866907 MHz  
 WDW EM  
 SSB 0  
 LB 1.00 Hz  
 GB 0  
 PC 3.00

Figure S10.  $^{11}\text{B}\{^1\text{H}\}$  NMR spectra of **2b** in  $\text{C}_6\text{D}_6$  at 298 K.

Nutzer Libo Xiang  
%P31\_CPD\_128ns CDCl3 (D:\NMR-Daten\_AV\_III\_Nanobay) Xiang 52

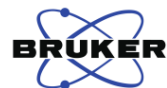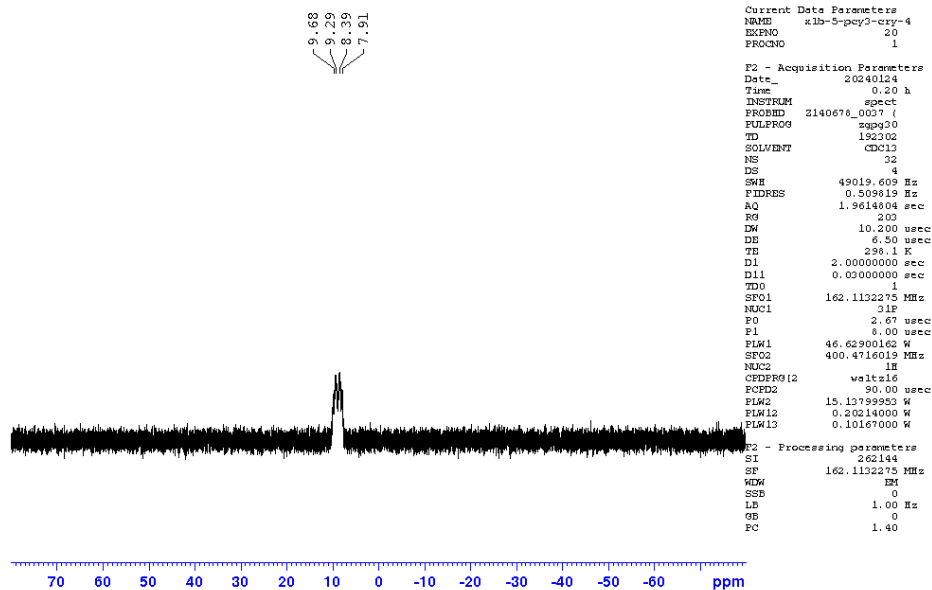

Figure S11.  $^{31}\text{P}\{^1\text{H}\}$  NMR spectrum of **2b** in  $\text{C}_6\text{D}_6$  at 298 K.

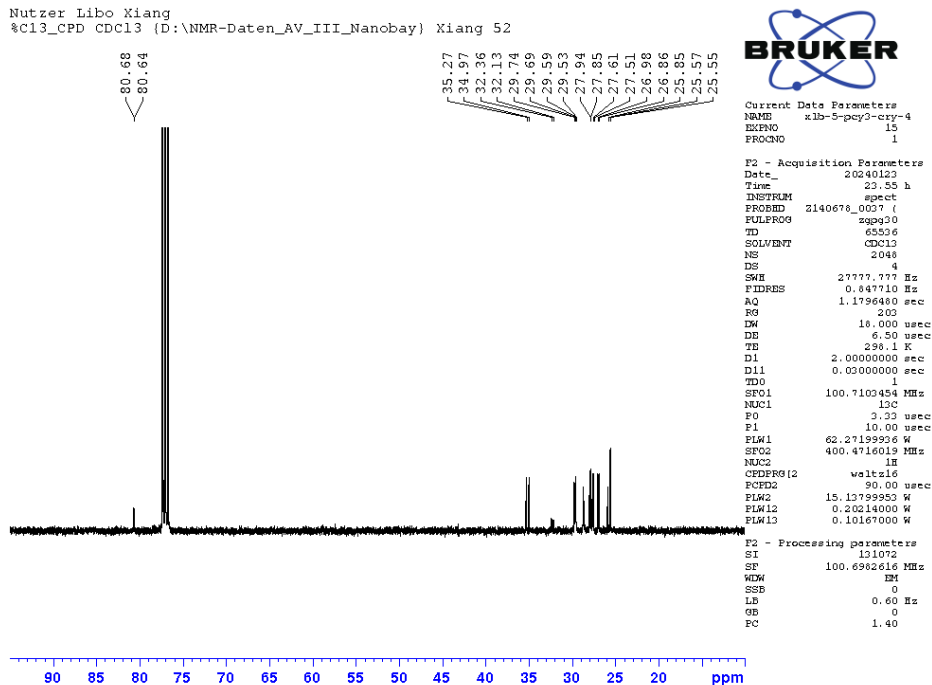

Figure S12.  $^{13}\text{C}\{^1\text{H}\}$  NMR spectra of **2b** in  $\text{C}_6\text{D}_6$  at 298 K.

Nutzer Libo Xiang  
 %Proton\_32ns C6D6 (D:\NMR-Daten\_AV\_III\_Nanobay) Xiang 43

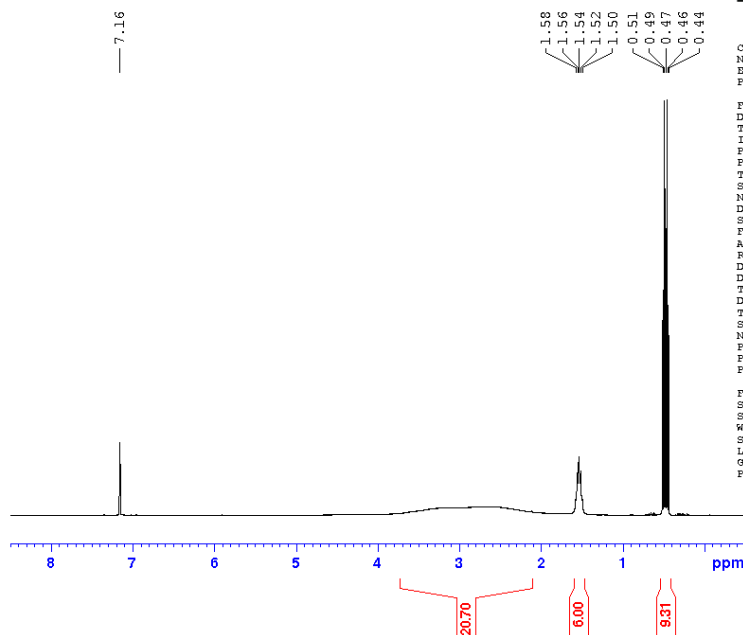

Figure S13.  $^1\text{H}$  NMR spectra of **2c** in  $\text{C}_6\text{D}_6$  at 298 K.

Nutzer Libo Xiang  
 %ProB11dec\_32ns C6D6 (D:\NMR-Daten\_AV\_III\_Nanobay) Xiang 43

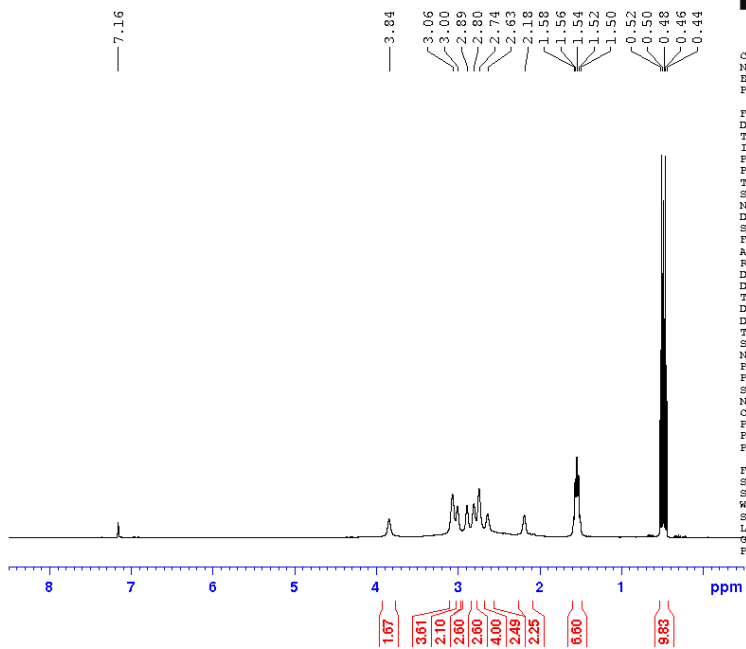

Figure S14.  $^1\text{H}\{^{11}\text{B}\}$  NMR spectra of **2c** in  $\text{C}_6\text{D}_6$  at 298 K.

Nutzer Libo Xiang  
%B11\_ZG\_256ns C6D6 (D:\NMR-Daten\_AV\_III\_Nanobay) Xiang 43

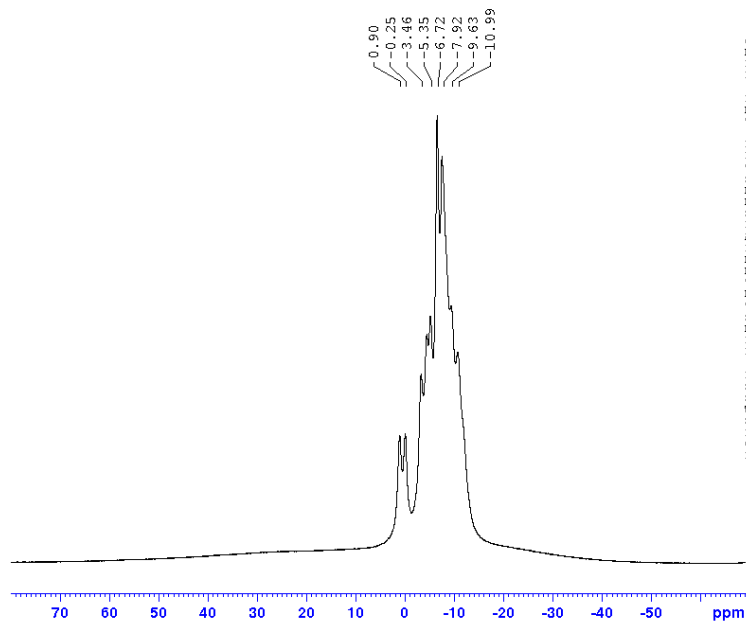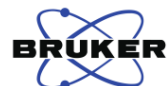

Current Data Parameters  
NAME xlb-5-pet3-cry-2  
EXFNO 27  
PROCNO 1

F2 - Acquisition Parameters  
Date\_ 20240123  
Time 8.14 h  
INSTRUM spect  
PROBHD Z140678\_0037 (4  
PULPROG zgpg  
TD 20190  
SOLVENT C6D6  
NS 256  
DS 0  
SWH 25510.200 Hz  
FIDRES 2.527014 Hz  
AQ 0.3957240 sec  
RG 200  
DM 19.600 usec  
DE 6.50 usec  
TE 298.1 K  
D1 1.00000000 sec  
TD0 1  
SFO1 128.4905453 MHz  
NUC1 11B  
P1 9.95 usec  
PLW1 50.00000000 W

F2 - Processing parameters  
SI 32768  
SF 128.4866907 MHz  
WDW EM  
SSB 0  
LB 3.00 Hz  
GB 0  
PC 1.40

Figure S15.  $^{11}\text{B}$  NMR spectra of **2c** in  $\text{C}_6\text{D}_6$  at 298 K.

Nutzer Libo Xiang  
%B11\_CPD\_128ns C6D6 (D:\NMR-Daten\_AV\_III\_Nanobay) Xiang 43

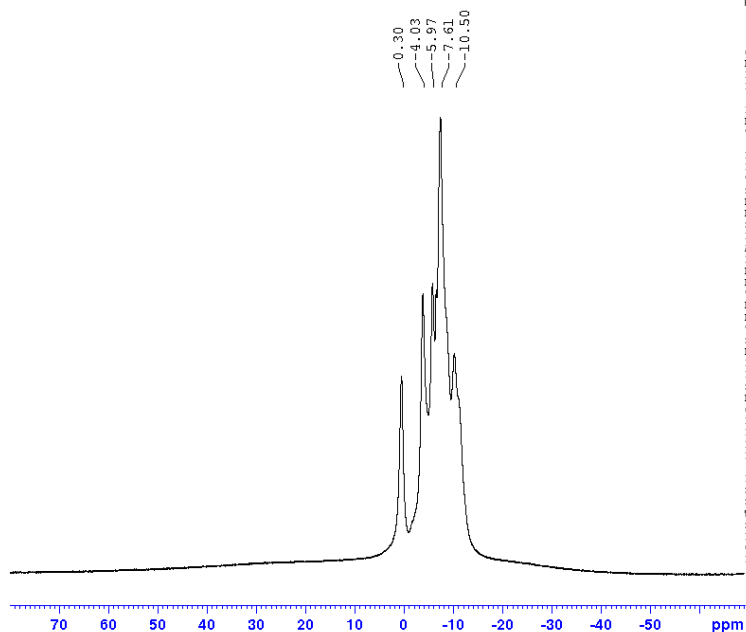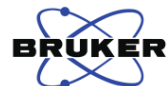

Current Data Parameters  
NAME xlb-5-pet3-cry-2  
EXFNO 26  
PROCNO 1

F2 - Acquisition Parameters  
Date\_ 20240123  
Time 8.07 h  
INSTRUM spect  
PROBHD Z140678\_0037 (4  
PULPROG zgpg  
TD 20190  
SOLVENT C6D6  
NS 128  
DS 0  
SWH 25510.200 Hz  
FIDRES 2.527014 Hz  
AQ 0.3957240 sec  
RG 200  
DM 19.600 usec  
DE 6.50 usec  
TE 298.1 K  
D1 1.00000000 sec  
D11 0.03000000 sec  
TD0 1  
SFO1 128.4905453 MHz  
NUC1 11B  
P1 9.95 usec  
PLW1 50.00000000 W  
SFO2 400.4720024 MHz  
NUC2 1H  
CPDPRG2 waltz16  
PCPD2 90.00 usec  
PLW2 15.13799953 W  
PLW12 0.20214000 W  
PLW13 0.10167000 W

F2 - Processing parameters  
SI 65536  
SF 128.4866907 MHz  
WDW EM  
SSB 0  
LB 1.00 Hz  
GB 0  
PC 3.00

Figure S16.  $^{11}\text{B}\{^1\text{H}\}$  NMR spectra of **2c** in  $\text{C}_6\text{D}_6$  at 298 K.

Nutzer Libo Xiang  
%P31\_CPD\_128ns C6D6 (D:\NMR-Daten\_AV\_III\_Nanobay) Xiang 43

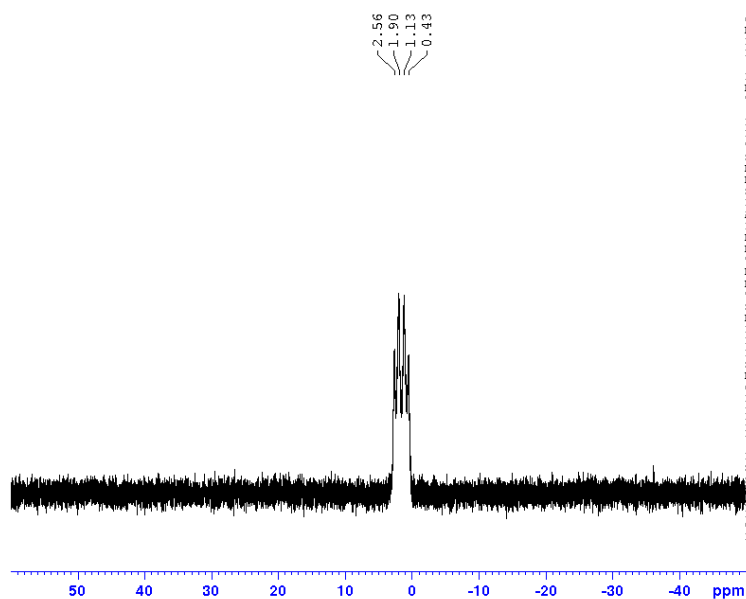

Current Data Parameters  
NAME xlb-5-pet3-cry-2  
EXPNO 20  
PROCNO 1

F2 - Acquisition Parameters  
Date\_ 20240123  
Time 8.28 h  
INSTRUM spect  
PROBHD Z140678\_0037 (   
FULPROG zgpg30  
TD 152302  
SOLVENT C6D6  
NS 32  
DS 4  
SWH 49019.609 Hz  
FIDRES 0.509819 Hz  
AQ 1.9614804 sec  
RG 203  
DW 10.200 usec  
DE 6.50 usec  
TE 298.1 K  
D1 2.0000000 sec  
D11 0.0300000 sec  
TD0 1  
SFO1 162.1132275 MHz  
NUC1 31P  
P0 2.67 usec  
P1 8.00 usec  
PLW1 46.62900162 W  
SFO2 400.4716019 MHz  
NUC2 1H  
CPDPRG2 waltz16  
PCPD2 90.00 usec  
PLW2 15.12799953 W  
PLW12 0.20214000 W  
PLW13 0.10167000 W

F2 - Processing parameters  
SI 262144  
SF 162.1132275 MHz  
WDW EM  
SSB 0  
LB 1.00 Hz  
GB 0  
PC 1.40

Figure S17.  $^{31}\text{P}\{^1\text{H}\}$  NMR spectrum of **2c** in  $\text{C}_6\text{D}_6$  at 298 K.

Nutzer Libo Xiang  
%C13\_CPD C6D6 (D:\NMR-Daten\_AV\_III\_Nanobay) Xiang 43

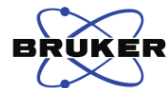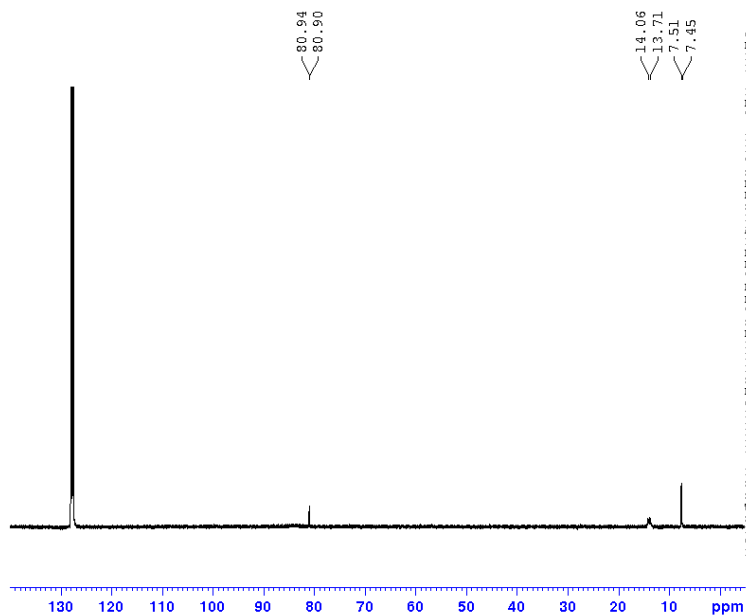

Current Data Parameters  
NAME xlb-5-pet3-cry-2  
EXPNO 31  
PROCNO 1

F2 - Acquisition Parameters  
Date\_ 20240123  
Time 21.56 h  
INSTRUM spect  
PROBHD Z140678\_0037 (   
FULPROG zgpg30  
TD 65536  
SOLVENT C6D6  
NS 2048  
DS 4  
SWH 27777.777 Hz  
FIDRES 0.847710 Hz  
AQ 1.1796480 sec  
RG 203  
DW 18.000 usec  
DE 6.50 usec  
TE 298.1 K  
D1 2.0000000 sec  
D11 0.0300000 sec  
TD0 1  
SFO1 100.7102454 MHz  
NUC1 13C  
P0 2.23 usec  
P1 10.00 usec  
PLW1 62.27199956 W  
SFO2 400.4716019 MHz  
NUC2 1H  
CPDPRG2 waltz16  
PCPD2 90.00 usec  
PLW2 15.12799953 W  
PLW12 0.20214000 W  
PLW13 0.10167000 W

F2 - Processing parameters  
SI 131072  
SF 100.6982616 MHz  
WDW EM  
SSB 0  
LB 0.60 Hz  
GB 0  
PC 1.40

Figure S18.  $^{13}\text{C}\{^1\text{H}\}$  NMR spectra of **2c** in  $\text{C}_6\text{D}_6$  at 298 K.



Nutzer Libo Xiang  
 %Proton\_32ns C6D6 [D:\NMR-Daten\_AV\_III\_Nanobay] Xiang 41

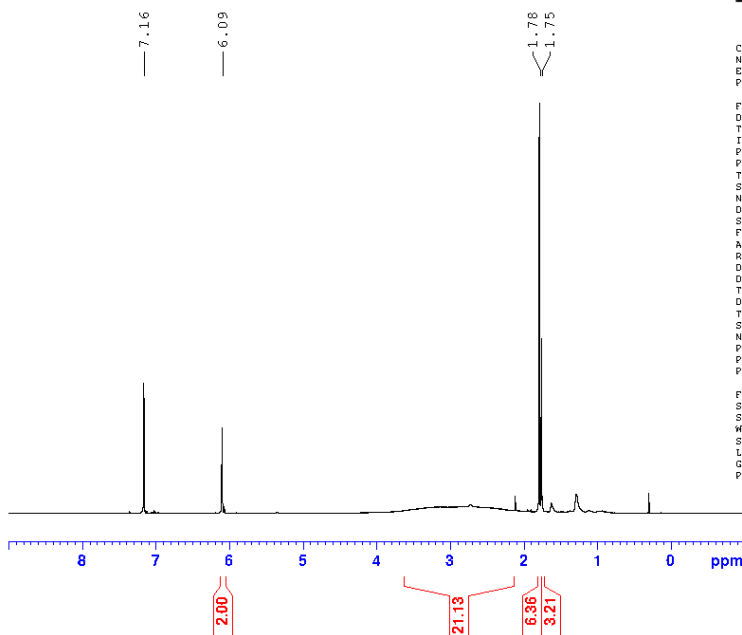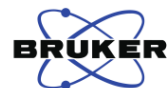

Current Data Parameters  
 NAME x1b-5-MeCN-cry  
 EXPNO 29  
 PROCNO 1

F2 - Acquisition Parameters  
 Date\_ 20231126  
 Time 7.30 h  
 INSTRUM spect  
 PROBHD Z140678\_0037\_1  
 PULPROG zg30  
 TD 96152  
 SOLVENT C6D6  
 NS 32  
 DS 0  
 SWH 8012.820 Hz  
 FIDRES 0.166670 Hz  
 AQ 5.9998846 sec  
 RG 71.8  
 DW 62.400 usec  
 DE 6.50 usec  
 TE 298.1 K  
 D1 1.00000000 sec  
 TD0 1  
 SF01 400.4724731 MHz  
 NUC1 1H  
 P0 3.47 usec  
 P1 10.40 usec  
 PLW1 15.13799953 W

F2 - Processing parameters  
 SI 131072  
 SF 400.4699968 MHz  
 WDW EM  
 SSB 0  
 LB 0 Hz  
 GB 0  
 PC 1.40

Figure S19.  $^1\text{H}$  NMR spectra of **3a** in  $\text{C}_6\text{D}_6$  at 298 K.

Nutzer Libo Xiang  
 %ProB11dec\_32ns C6D6 [D:\NMR-Daten\_AV\_III\_Nanobay] Xiang 41

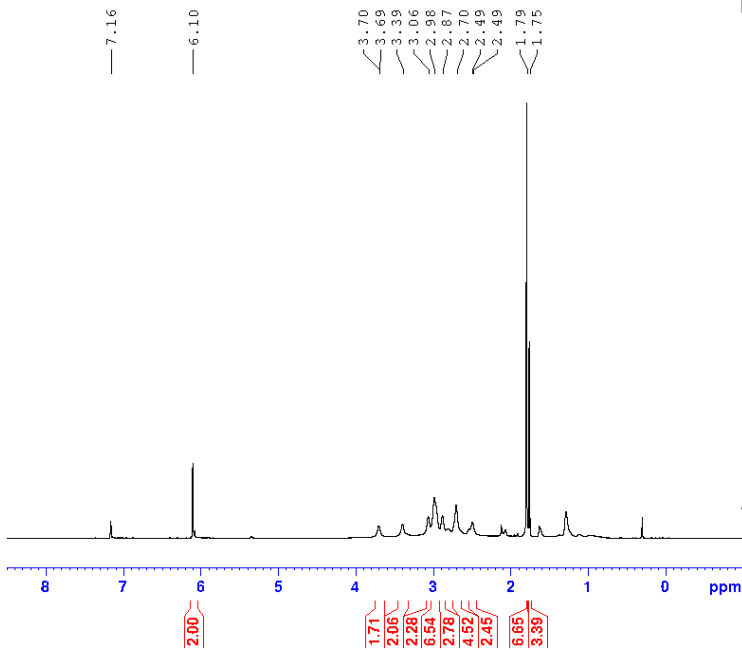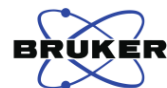

Current Data Parameters  
 NAME x1b-5-MeCN-cry  
 EXPNO 31  
 PROCNO 1

F2 - Acquisition Parameters  
 Date\_ 20231126  
 Time 7.35 h  
 INSTRUM spect  
 PROBHD Z140678\_0037\_1  
 PULPROG zg30  
 TD 73890  
 SOLVENT C6D6  
 NS 32  
 DS 2  
 SWH 8223.685 Hz  
 FIDRES 0.222593 Hz  
 AQ 4.4925122 sec  
 RG 22.6  
 DW 60.800 usec  
 DE 6.50 usec  
 TE 298.1 K  
 D1 1.00000000 sec  
 D11 0.03000000 sec  
 TD0 1  
 SF01 400.4724731 MHz  
 NUC1 1H  
 P1 10.40 usec  
 PLW1 15.13799953 W  
 SF02 128.4852773 MHz  
 NUC2 11B  
 CPOPRG2 waltz16  
 PCPD2 100.00 usec  
 PLW2 50.00000000 W  
 PLW12 0.49500999 W

F2 - Processing parameters  
 SI 131072  
 SF 400.4699968 MHz  
 WDW EM  
 SSB 0  
 LB 0 Hz  
 GB 0  
 PC 1.00

Figure S20.  $^1\text{H}\{^{11}\text{B}\}$  NMR spectra of **3a** in  $\text{C}_6\text{D}_6$  at 298 K.

Nutzer Libo Xiang  
%B11\_ZG\_256ns C6D6 [D:\NMR-Daten\_AV\_III\_Nanobay] Xiang 41

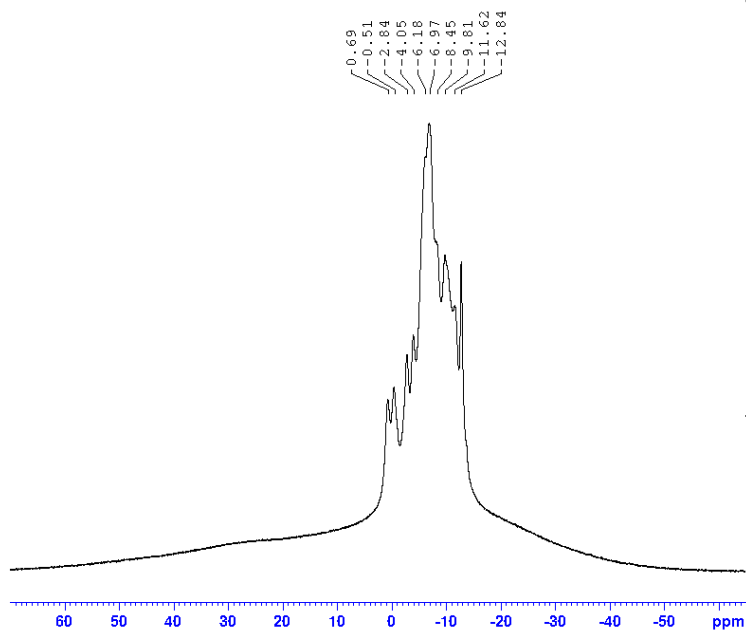

Current Data Parameters  
NAME xlb-5-MeNC-cry  
EXPNO 28  
PROCNO 1

F2 - Acquisition Parameters  
Date\_ 20231126  
Time 7.25 h  
INSTRUM spect  
PROBHD Z140678\_0037 1  
PULPROG zg  
TD 20190  
SOLVENT C6D6  
NS 256  
DS 0  
SWH 25510.203 Hz  
FIDRES 2.527014 Hz  
AQ 0.3957240 sec  
RG 203  
DW 19.600 usec  
DE 6.50 usec  
TE 298.1 K  
D1 1.00000000 sec  
TD0 1  
SF01 128.4905453 MHz  
NUC1 11B  
P1 9.95 usec  
PLW1 50.00000000 W

F2 - Processing parameters  
SI 32768  
SF 128.4866907 MHz  
WDW EM  
SSB 0  
LB 3.00 Hz  
GB 0  
PC 1.40

Figure S21.  $^{11}\text{B}$  NMR spectra of **3a** in  $\text{C}_6\text{D}_6$  at 298 K.

Nutzer Libo Xiang  
%B11\_CPD\_128ns C6D6 [D:\NMR-Daten\_AV\_III\_Nanobay] Xiang 41

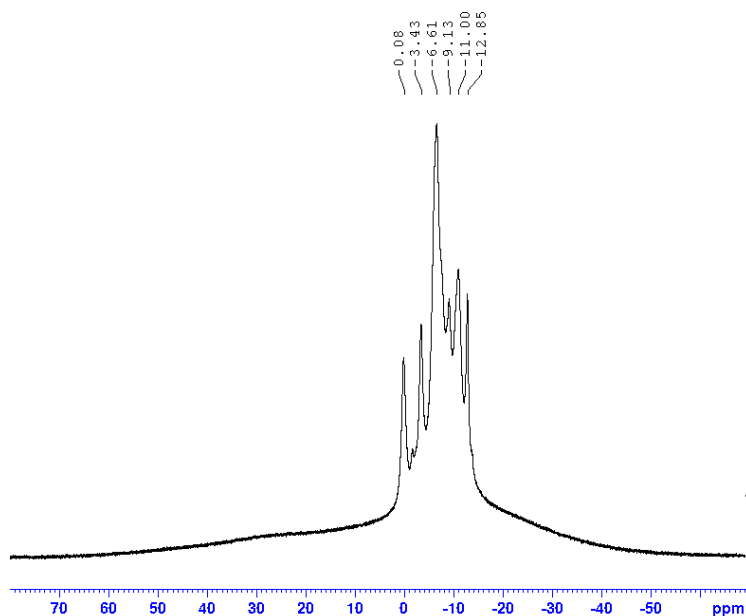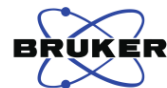

Current Data Parameters  
NAME xlb-5-MeNC-cry  
EXPNO 27  
PROCNO 1

F2 - Acquisition Parameters  
Date\_ 20231126  
Time 7.19 h  
INSTRUM spect  
PROBHD Z140678\_0037 1  
PULPROG zpgg  
TD 20190  
SOLVENT C6D6  
NS 128  
DS 0  
SWH 25510.203 Hz  
FIDRES 2.527014 Hz  
AQ 0.3957240 sec  
RG 203  
DW 19.600 usec  
DE 6.50 usec  
TE 298.1 K  
D1 1.00000000 sec  
D11 0.03000000 sec  
TD0 1  
SF01 128.4905453 MHz  
NUC1 11B  
P1 9.95 usec  
PLW1 50.00000000 W  
SF02 400.4720024 MHz  
NUC2 1H  
CPDPRG2 waltz16  
PCPD2 90.00 usec  
PLW2 15.13799953 W  
PLW12 0.20214000 W  
PLW13 0.10157000 W

F2 - Processing parameters  
SI 65536  
SF 128.4866907 MHz  
WDW EM  
SSB 0  
LB 1.00 Hz  
GB 0  
PC 3.00

Figure S22.  $^{11}\text{B}\{^1\text{H}\}$  NMR spectra of **3a** in  $\text{C}_6\text{D}_6$  at 298 K.

Nutzer Libo Xiang  
%c13\_CPD C6D6 (D:\NMR-Daten\_AV\_III\_Nanobay) Xiang 41

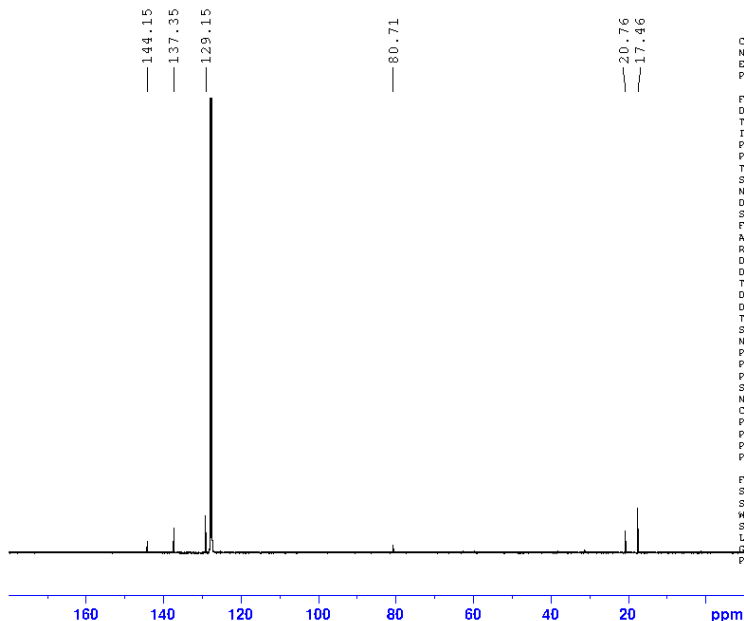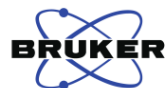

Current Data Parameters  
NAME x1b-5-Me6NC-cry  
EXPNO 30  
PROCNO 1

F2 - Acquisition Parameters  
Date\_ 20231125  
Time 12.07 h  
INSTRUM spect  
PROBHD Z140678\_0037 J  
PULPROG zgpg30  
TD 65536  
SOLVENT C6D6  
NS 5000  
DS 4  
SWH 27777.777 Hz  
FIDRES 0.847710 Hz  
AQ 1.1796480 sec  
RG 203  
DW 18.000 usec  
DE 6.50 usec  
TE 298.1 K  
D1 2.00000000 sec  
D11 0.03000000 sec  
TD0 1  
SF01 100.7103454 MHz  
NUC1 13C  
P0 3.33 usec  
P1 10.00 usec  
PLW1 62.27199936 W  
SF02 400.4716019 MHz  
NUC2 1H  
PCPD2[2] walcz16  
PCPD2 90.00 usec  
PLW2 15.13799953 W  
PLW12 0.20214000 W  
PLW13 0.10167000 W

F2 - Processing parameters  
SI 131072  
SF 100.6982616 MHz  
WDW EM  
SSB 0  
LB 0.60 Hz  
GB 0  
PC 1.40

Figure S23.  $^{13}\text{C}\{^1\text{H}\}$  NMR spectra of **3a** in  $\text{C}_6\text{D}_6$  at 298 K.

Nutzer Libo Xiang  
%Proton\_32ns C6D6 (D:\NMR-Daten\_AV\_III\_Nanobay) Xiang 53

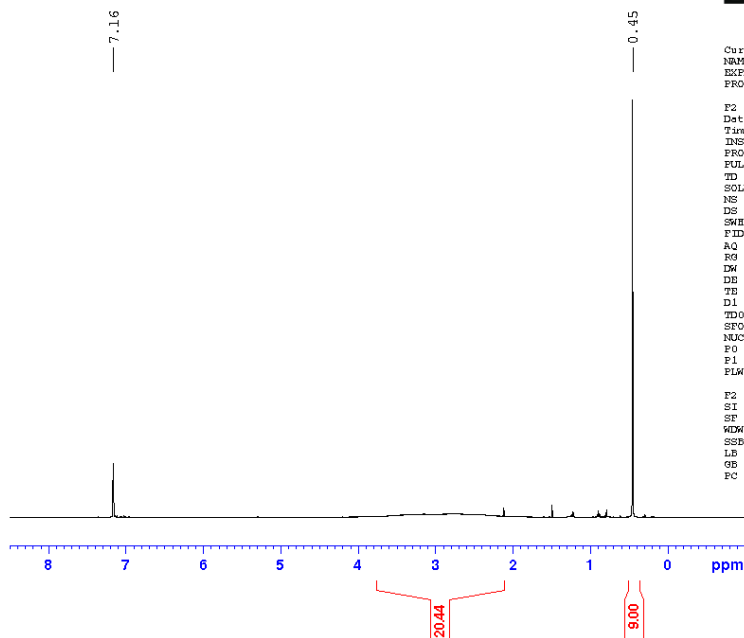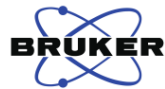

Current Data Parameters  
NAME x1b-5-tBunc-cry-1  
EXPNO 12  
PROCNO 1

F2 - Acquisition Parameters  
Date\_ 20240124  
Time 0.43 h  
INSTRUM spect  
PROBHD Z140678\_0037 J  
PULPROG zg20  
TD 96152  
SOLVENT C6D6  
NS 32  
DS 0  
SWH 8012.820 Hz  
FIDRES 0.166670 Hz  
AQ 5.9998846 sec  
RG 11.8  
DW 62.400 usec  
DE 6.50 usec  
TE 298.1 K  
D1 1.00000000 sec  
TD0 1  
SF01 400.4724721 MHz  
NUC1 1H  
P0 3.47 usec  
P1 10.40 usec  
PLW1 15.13799953 W

F2 - Processing parameters  
SI 131072  
SF 400.4699967 MHz  
WDW EM  
SSB 0  
LB 0 Hz  
GB 0  
PC 1.40

Figure S24.  $^1\text{H}$  NMR spectra of **3b** in  $\text{C}_6\text{D}_6$  at 298 K.

Nutzer Libo Xiang  
 %Probl1dec\_32ns C6D6 (D:\NMR-Daten\_AV\_III\_Nanobay) Xiang 53

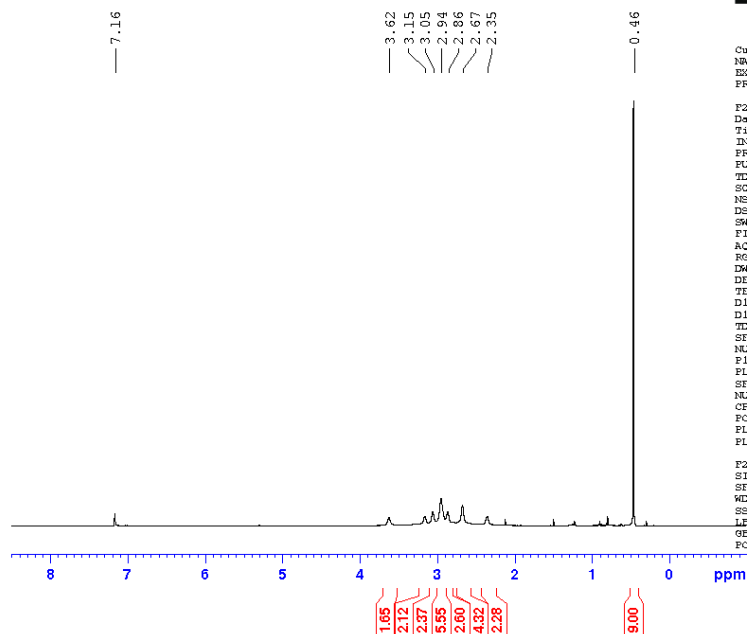

Current Data Parameters  
 NAME xlb-5-tBunc-cxy-1  
 EXPNO 13  
 PROCNO 1

F2 - Acquisition Parameters  
 Date\_ 20240124  
 Time 0.47 h  
 INSTRUM spect  
 PROBHD Z140678\_0037 ( )  
 PULPROG zgpg  
 TD 73690  
 SOLVENT C6D6  
 NS 32  
 DS 2  
 SWH 6223.665 Hz  
 FIDRES 0.222593 Hz  
 AQ 4.4925122 sec  
 RG 22.6  
 DW 60.800 usec  
 DE 6.50 usec  
 TE 298.1 K  
 D1 1.00000000 sec  
 D11 0.03000000 sec  
 TD0 1  
 SFO1 400.4724731 MHz  
 NUC1 1H  
 P1 10.40 usec  
 PL1 15.13799883 W  
 SFO2 126.4652773 MHz  
 NUC2 11B  
 CDEPRG12 waltz16  
 PCPD2 100.00 usec  
 PLW2 50.00000000 W  
 PLW12 0.49500999 W

F2 - Processing parameters  
 SI 131072  
 SF 400.4699967 MHz  
 WDM EM  
 SSB 0  
 LB 0 Hz  
 GB 0  
 PC 1.00

Figure S25.  $^1\text{H}\{^{11}\text{B}\}$  NMR spectra of **3a** in  $\text{C}_6\text{D}_6$  at 298 K.

Nutzer Libo Xiang  
 %B11\_2G\_256ns C6D6 (D:\NMR-Daten\_AV\_III\_Nanobay) Xiang 53

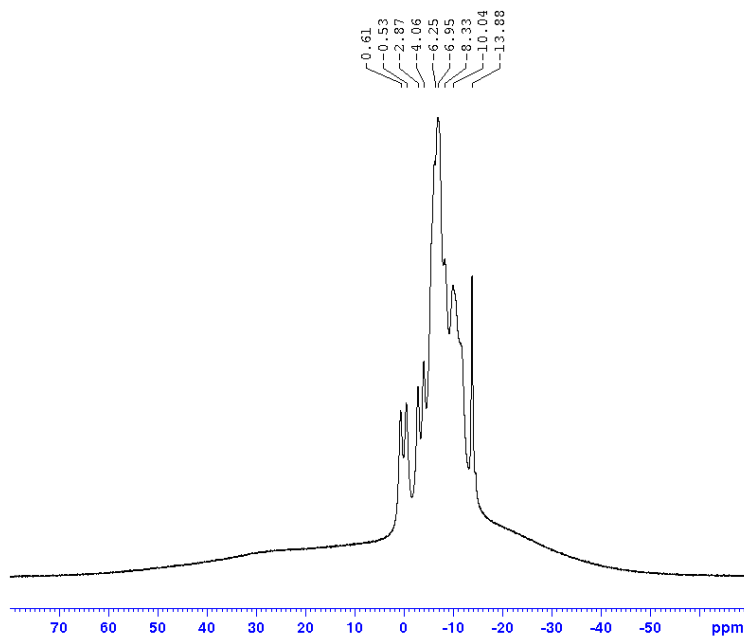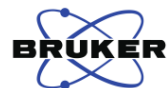

Current Data Parameters  
 NAME xlb-5-tBunc-cxy-1  
 EXPNO 11  
 PROCNO 1

F2 - Acquisition Parameters  
 Date\_ 20240124  
 Time 0.28 h  
 INSTRUM spect  
 PROBHD Z140678\_0037 ( )  
 PULPROG zg  
 TD 20190  
 SOLVENT C6D6  
 NS 256  
 DS 0  
 SWH 25510.203 Hz  
 FIDRES 2.527014 Hz  
 AQ 0.3957240 sec  
 RG 203  
 DW 19.600 usec  
 DE 6.50 usec  
 TE 298.1 K  
 D1 1.00000000 sec  
 TD0 1  
 SFO1 126.4905453 MHz  
 NUC1 11B  
 P1 9.95 usec  
 PLW1 50.00000000 W

F2 - Processing parameters  
 SI 52768  
 SF 126.4666907 MHz  
 WDM EM  
 SSB 0  
 LB 3.00 Hz  
 GB 0  
 PC 1.40

Figure S26.  $^{11}\text{B}$  NMR spectra of **3b** in  $\text{C}_6\text{D}_6$  at 298 K.

Nutzer Libo Xiang  
 %B11\_CPD\_128ns C6D6 (D:\NMR-Daten\_AV\_III\_Nanobay) Xiang 53

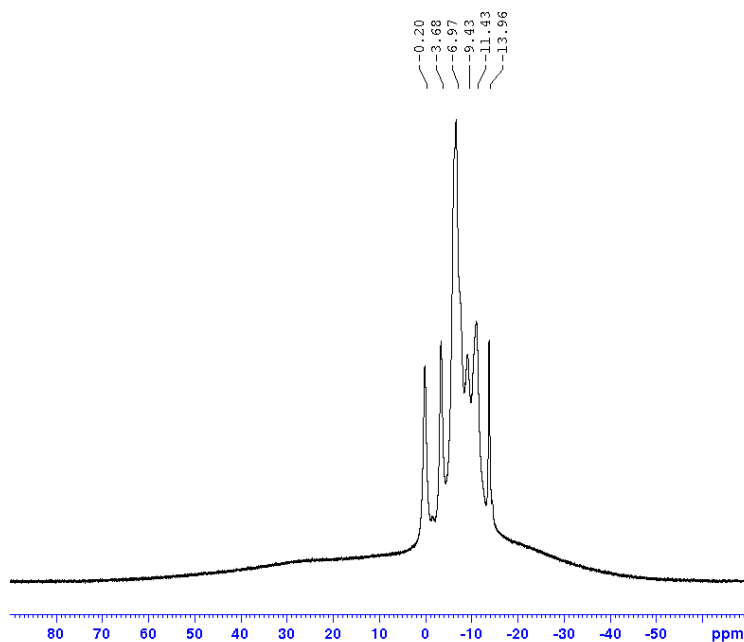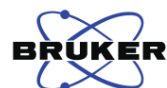

Current Data Parameters  
 NAME x1b-5-tBunc-cxy-1  
 EXPNO 10  
 PROCNO 1

F2 - Acquisition Parameters  
 Date\_ 20240124  
 Time 0.21 h  
 INSTRUM spect  
 PROBHD Z140678\_0037 ( )  
 PULPROG zgpg  
 TD 20190  
 SOLVENT C6D6  
 NS 128  
 DS 0  
 SWH 25510.200 Hz  
 FIDRES 2.527014 Hz  
 AQ 0.3957240 sec  
 RG 200  
 DW 19.600 usec  
 DE 6.50 usec  
 TE 298.1 K  
 D1 1.0000000 sec  
 D11 0.0300000 sec  
 TD0 1  
 SFO1 128.4905453 MHz  
 NUC1 11B  
 P1 9.95 usec  
 PL11 50.0000000 W  
 SFO2 400.4720024 MHz  
 NUC2 1H  
 CPDPRG2 waltz16  
 PCPD2 90.00 usec  
 PLW2 15.1379953 W  
 PLW12 0.20214000 W  
 PLW13 0.10167000 W

F2 - Processing parameters  
 SI 65536  
 SF 128.4866907 MHz  
 WDW EM  
 SSB 0  
 LB 1.00 Hz  
 GB 0  
 PC 3.00

Figure S27.  $^1\text{H}\{^1\text{H}\}$  NMR spectra of **3b** in  $\text{C}_6\text{D}_6$  at 298 K.

Nutzer Libo Xiang  
 %C13\_CPD C6D6 (D:\NMR-Daten\_AV\_III\_Nanobay) Xiang 53

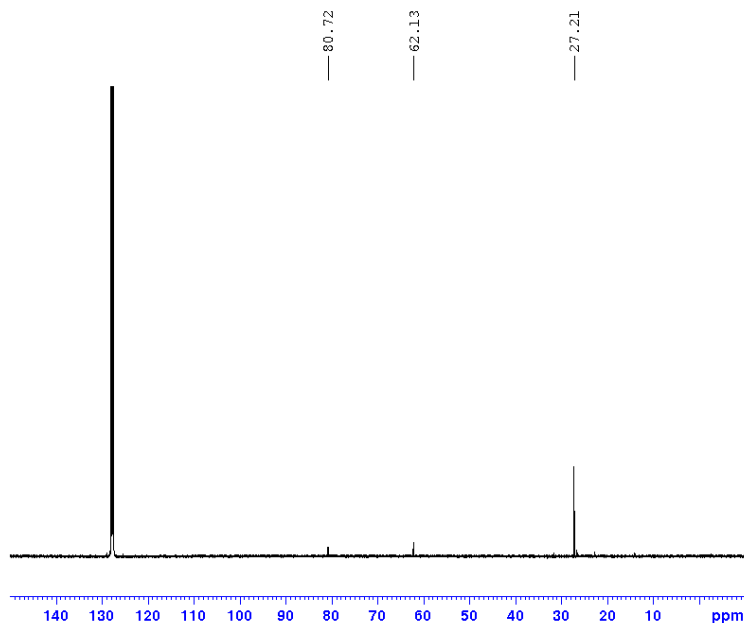

Current Data Parameters  
 NAME x1b-5-tBunc-cxy-1  
 EXPNO 14  
 PROCNO 1

F2 - Acquisition Parameters  
 Date\_ 20240124  
 Time 5.40 h  
 INSTRUM spect  
 PROBHD Z140678\_0037 ( )  
 PULPROG zgpg30  
 TD 65536  
 SOLVENT C6D6  
 NS 2048  
 DS 4  
 SWH 27777.777 Hz  
 FIDRES 0.647710 Hz  
 AQ 1.1796480 sec  
 RG 200  
 DW 18.000 usec  
 DE 6.50 usec  
 TE 298.1 K  
 D1 2.0000000 sec  
 D11 0.0300000 sec  
 TD0 1  
 SFO1 100.7103454 MHz  
 NUC1 13C  
 P0 3.23 usec  
 PL1 10.00 usec  
 PLW1 62.27199926 W  
 SFO2 400.4716019 MHz  
 NUC2 1H  
 CPDPRG2 waltz16  
 PCPD2 90.00 usec  
 PLW2 15.1379953 W  
 PLW12 0.20214000 W  
 PLW13 0.10167000 W

F2 - Processing parameters  
 SI 131072  
 SF 100.6982616 MHz  
 WDW EM  
 SSB 0  
 LB 0.60 Hz  
 GB 0  
 PC 1.40

Figure S28.  $^{13}\text{C}\{^1\text{H}\}$  NMR spectra of **3b** in  $\text{C}_6\text{D}_6$  at 298 K.

Nutzer Libo Xiang  
 %Proton\_32ns C6D6 {D:\NMR-Daten\_AV\_III\_Nanobay} Xiang 23

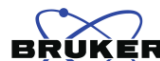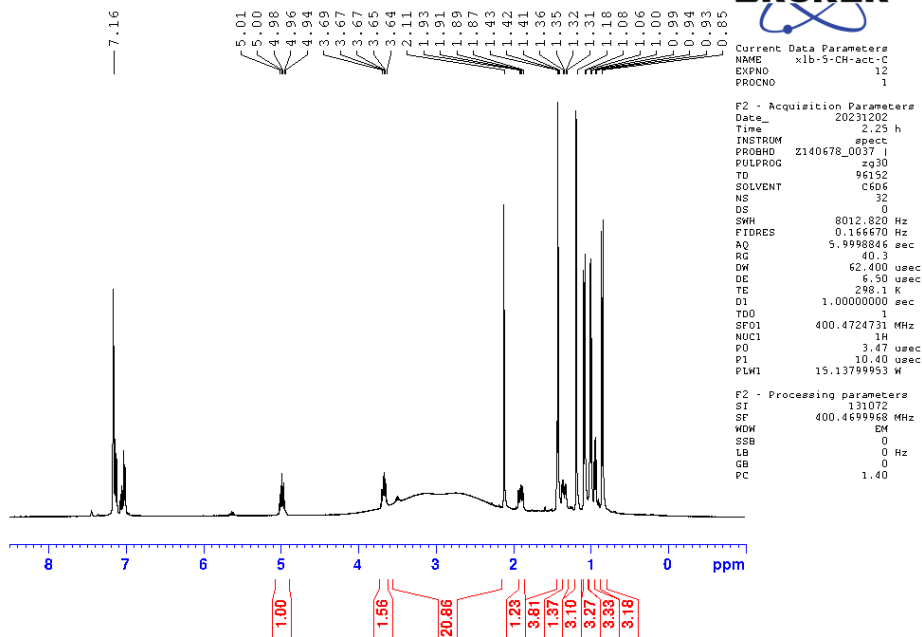

Figure S29.  $^1\text{H}$  NMR spectra of 4 in  $\text{C}_6\text{D}_6$  at 298 K.

Nutzer Libo Xiang  
 %ProB11dec\_32ns C6D6 {D:\NMR-Daten\_AV\_III\_Nanobay} Xiang 23

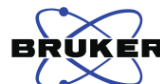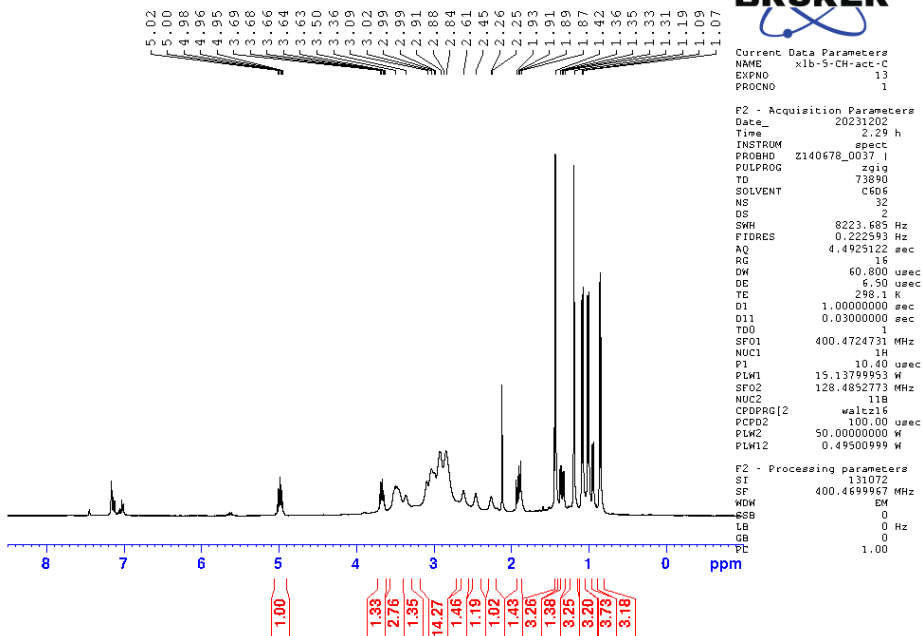

Figure S30.  $^1\text{H}\{^{11}\text{B}\}$  NMR spectra of 4 in  $\text{C}_6\text{D}_6$  at 298 K.

Nutzer Libo Xiang  
%B11\_ZG\_256ns C6D6 [D:\NMR-Daten\_AV\_III\_Nanobay] Xiang 23

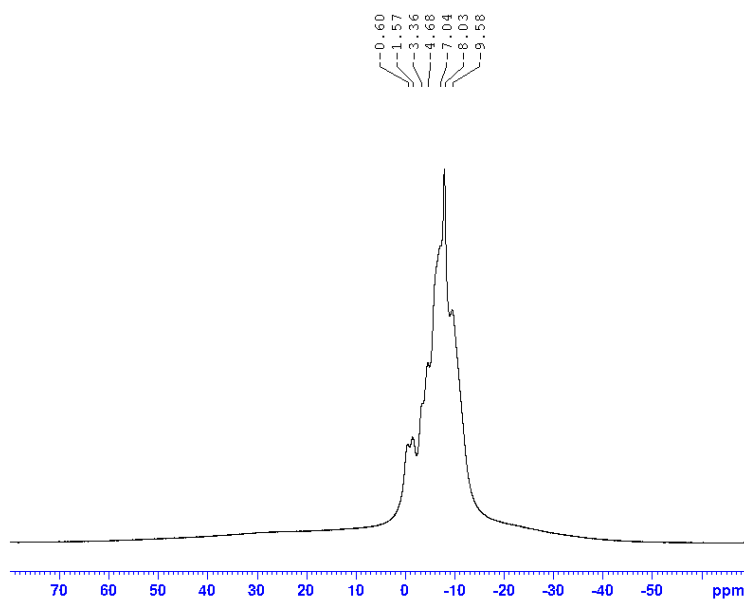

Current Data Parameters  
NAME xlb-5-CH-act-C  
EXPNO 11  
PROCNO 1

F2 - Acquisition Parameters  
Date\_ 20231202  
Time 2.20 h  
INSTRUM spect  
PROBHD Z140678\_0037 1  
PULPROG zg  
TD 20190  
SOLVENT C6D6  
NS 256  
DS 0  
SWH 25510.203 Hz  
FIDRES 2.527014 Hz  
AQ 0.3957240 sec  
RG 203  
DW 19.600 usec  
DE 6.50 usec  
TE 298.1 K  
D1 1.00000000 sec  
TD0 1  
SF01 128.4905453 MHz  
NUC1 11B  
P1 9.95 usec  
PLW1 50.00000000 W

F2 - Processing parameters  
SI 32768  
SF 128.4866907 MHz  
WDW EM  
SSB 0  
LB 3.00 Hz  
GB 0  
PC 1.40

Figure S31.  $^{11}\text{B}$  NMR spectra of **4** in  $\text{C}_6\text{D}_6$  at 298 K.

Nutzer Libo Xiang  
%B11\_CPD\_128ns C6D6 [D:\NMR-Daten\_AV\_III\_Nanobay] Xiang 23

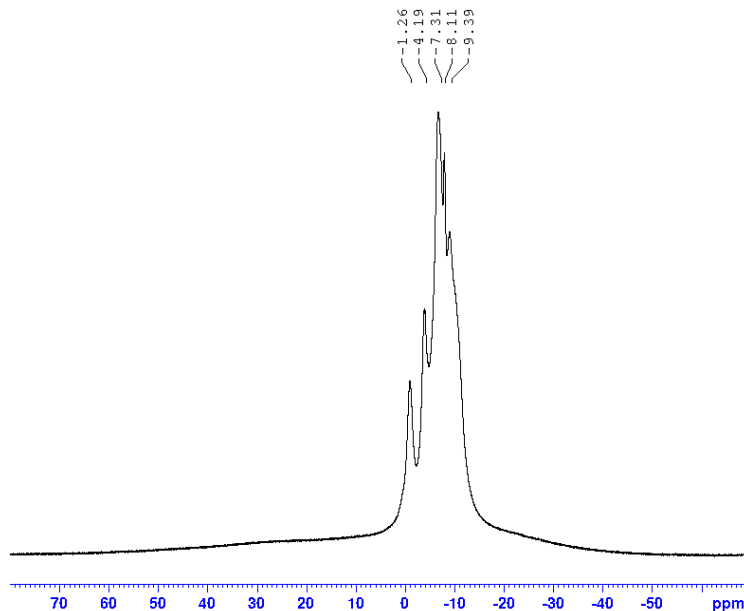

Current Data Parameters  
NAME xlb-5-CH-act-C  
EXPNO 10  
PROCNO 1

F2 - Acquisition Parameters  
Date\_ 20231202  
Time 2.13 h  
INSTRUM spect  
PROBHD Z140678\_0037 1  
PULPROG zpgg  
TD 20190  
SOLVENT C6D6  
NS 128  
DS 0  
SWH 25510.203 Hz  
FIDRES 2.527014 Hz  
AQ 0.3957240 sec  
RG 203  
DW 19.600 usec  
DE 6.50 usec  
TE 298.1 K  
D1 1.00000000 sec  
D11 0.03000000 sec  
TD0 1  
SF01 128.4905453 MHz  
NUC1 11B  
P1 9.95 usec  
PLW1 50.00000000 W  
SF02 400.4720024 MHz  
NUC2 1H  
CPDPRG2 waltz16  
PCPD2 90.00 usec  
PLW2 15.13799953 W  
PLW12 0.20214000 W  
PLW13 0.10157000 W

F2 - Processing parameters  
SI 65536  
SF 128.4866907 MHz  
WDW EM  
SSB 0  
LB 1.00 Hz  
GB 0  
PC 3.00

Figure S32.  $^{11}\text{B}\{^1\text{H}\}$  NMR spectra of **4** in  $\text{C}_6\text{D}_6$  at 298 K.

Nutzer Libo Xiang  
 %C13\_CPD C6D6 (D:\NMR-Daten\_AV\_III\_Nanobay) Xiang 23

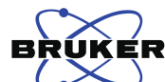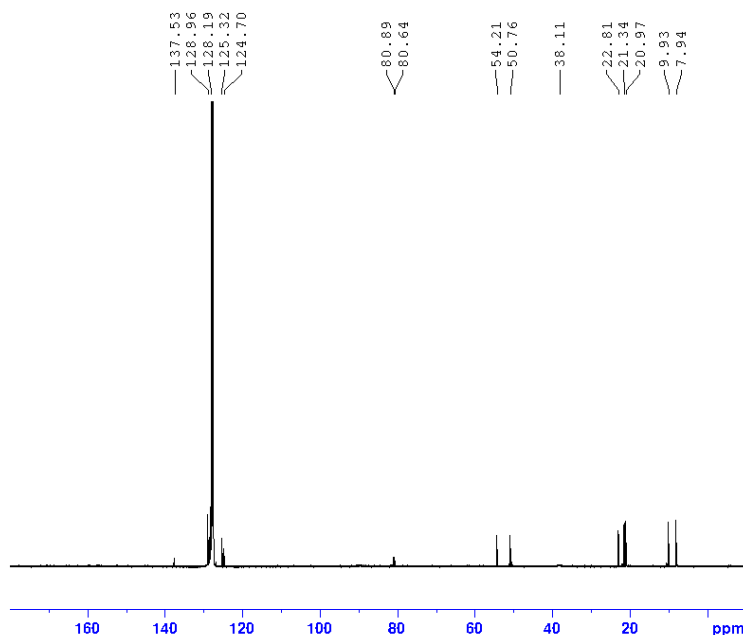

Current Data Parameters  
 NAME xlb-5-CH-act-C  
 EXPNO 14  
 PROCNO 1

F2 - Acquisition Parameters  
 Date\_ 20231202  
 Time 7.02 h  
 INSTRUM spect  
 PROBHD Z140678\_0037 J  
 PULPROG zgpg30  
 TD 65536  
 SOLVENT C6D6  
 NS 5000  
 DS 4  
 SWH 27777.777 Hz  
 FIDRES 0.847710 Hz  
 AQ 1.1796480 sec  
 RG 203  
 DW 18.000 usec  
 DE 6.50 usec  
 TE 298.1 K  
 D1 2.00000000 sec  
 D11 0.03000000 sec  
 TDD 1  
 SFO1 100.7103454 MHz  
 NUC1 13C  
 P0 3.33 usec  
 P1 10.00 usec  
 PLW1 62.27199936 W  
 SFO2 400.4716019 MHz  
 NUC2 1H  
 SFOPRG[2] walcz16  
 PCPD2 90.00 usec  
 PLW2 15.13799953 W  
 PLW12 0.20214000 W  
 PLW13 0.10167000 W

F2 - Processing parameters  
 SI 131072  
 SF 100.6982616 MHz  
 WDW EM  
 SSB 0  
 LB 0.60 Hz  
 GB 0  
 PC 1.40

Figure S33.  $^{13}\text{C}\{^1\text{H}\}$  NMR spectra of **4** in  $\text{C}_6\text{D}_6$  at 298 K.

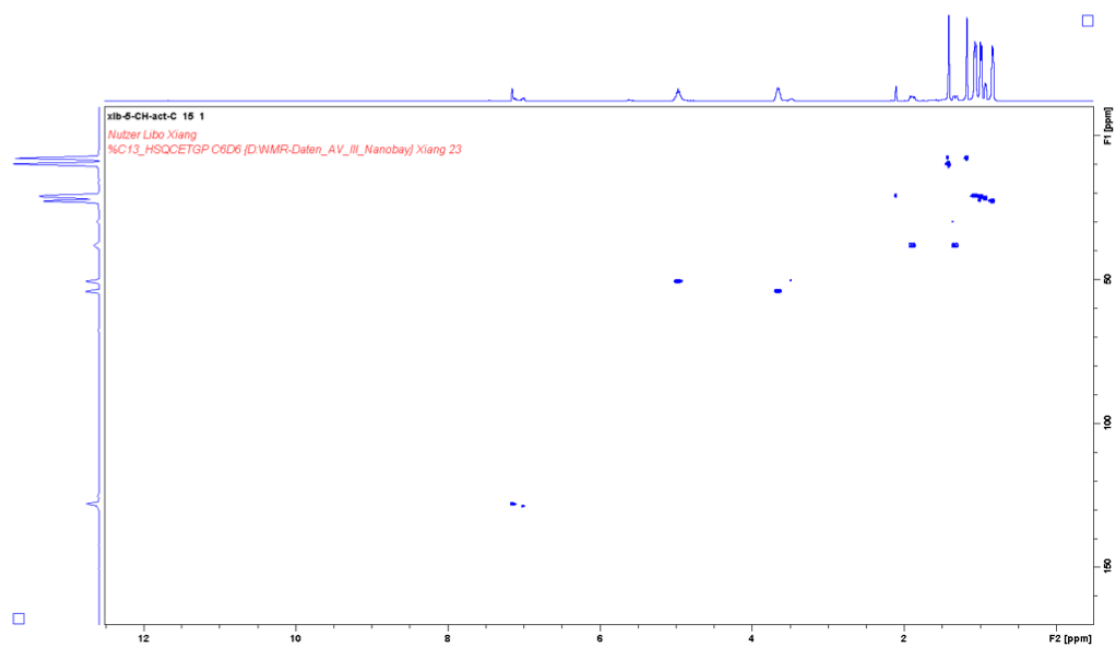

Figure S34. HSQC spectra of **4** in  $\text{C}_6\text{D}_6$  at 298 K.



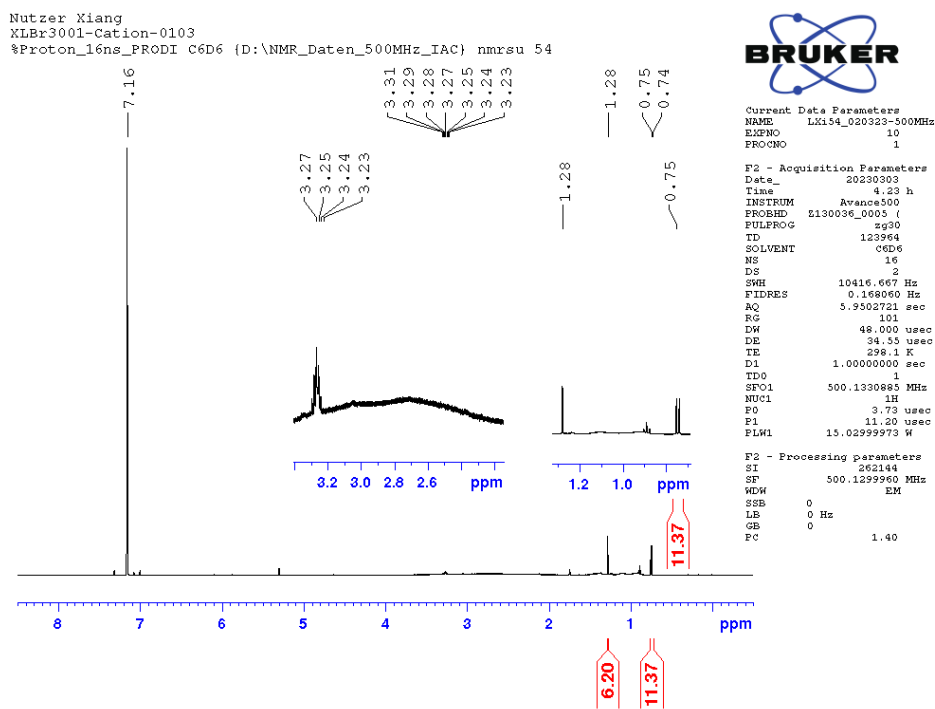

Figure S35.  $^1\text{H}$  NMR spectra of **5** in  $\text{C}_6\text{D}_6$  at 298 K.

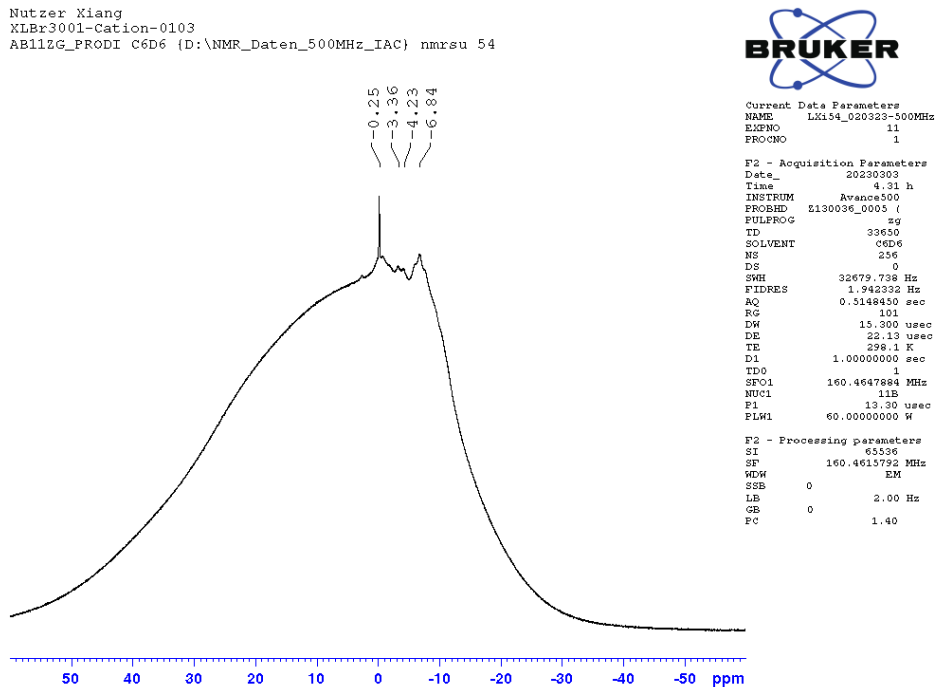

Figure S36.  $^{11}\text{B}$  NMR spectra of **5** in  $\text{C}_6\text{D}_6$  at 298 K.

Nutzer Xiang  
 XLBr3001-Cation-0103  
 AB11CPD\_PRODI C6D6 {D:\NMR\_Daten\_500MHz\_IAC} nmrsu 54

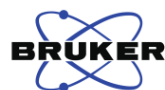

Current Data Parameters  
 NAME LK154\_020323-500MHz  
 EXPNO 12  
 PROCNO 1

F2 - Acquisition Parameters  
 Date\_ 20230303  
 Time 4.38 h  
 INSTRUM Avance500  
 PROBHD E130036\_0005 ( zggg  
 PULPROG zgpg30  
 TD 33630  
 SOLVENT C6D6  
 NS 256  
 DS 0  
 SWH 32679.738 Hz  
 FIDRES 1.942332 Hz  
 AQ 0.5148450 sec  
 RG 101  
 DW 15.300 usec  
 DE 22.13 usec  
 TE 298.1 K  
 D1 1.0000000 sec  
 D11 0.0300000 sec  
 TD0 1  
 SFO1 160.4679976 MHz  
 NUC1 11B  
 P1 13.30 usec  
 PLW1 60.0000000 W  
 SFO2 500.1320000 MHz  
 NUC2 1H  
 CPDPRG2 waltz16  
 PCPD2 65.00 usec  
 PLW2 15.02999973 W  
 PLW12 0.44624001 W  
 PLW13 0.14793999 W

F2 - Processing parameters  
 SI 63536  
 SF 160.4615752 MHz  
 WDW EM  
 SSB 0  
 LB 2.00 Hz  
 GB 0  
 PC 1.40

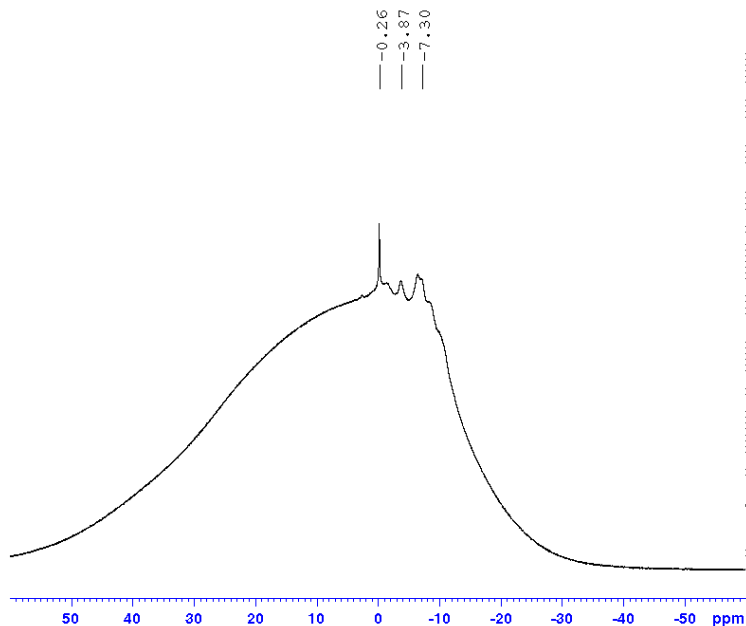

Figure S37.  $^{11}\text{B}\{^1\text{H}\}$  NMR spectra of **5** in  $\text{C}_6\text{D}_6$  at 298 K.

Nutzer Xiang  
 XLBr3001-Cation-0103  
 AC13CPD\_PRODI C6D6 {D:\NMR\_Daten\_500MHz\_IAC} nmrsu 54

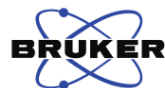

Current Data Parameters  
 NAME LK154\_020323-500MHz  
 EXPNO 17  
 PROCNO 1

F2 - Acquisition Parameters  
 Date\_ 20230303  
 Time 11.14 h  
 INSTRUM Avance500  
 PROBHD E130036\_0005 ( zggg30  
 PULPROG zgpg30  
 TD 123586  
 SOLVENT C6D6  
 NS 6144  
 DS 0  
 SWH 35714.285 Hz  
 FIDRES 0.568762 Hz  
 AQ 1.7582040 sec  
 RG 101  
 DW 14.000 usec  
 DE 19.40 usec  
 TE 298.1 K  
 D1 2.0000000 sec  
 D11 0.0300000 sec  
 TD0 1  
 SFO1 125.7728795 MHz  
 NUC1 13C  
 P1 3.13 usec  
 PLW1 9.40 usec  
 PLW1 65.83499908 W  
 SFO2 500.1320000 MHz  
 NUC2 1H  
 CPDPRG2 waltz16  
 PCPD2 65.00 usec  
 PLW2 15.02999973 W  
 PLW12 0.44624001 W  
 PLW13 0.14793999 W

F2 - Processing parameters  
 SI 262144  
 SF 125.7577885 MHz  
 WDW EM  
 SSB 0  
 LB 1.50 Hz  
 GB 0  
 PC 1.00

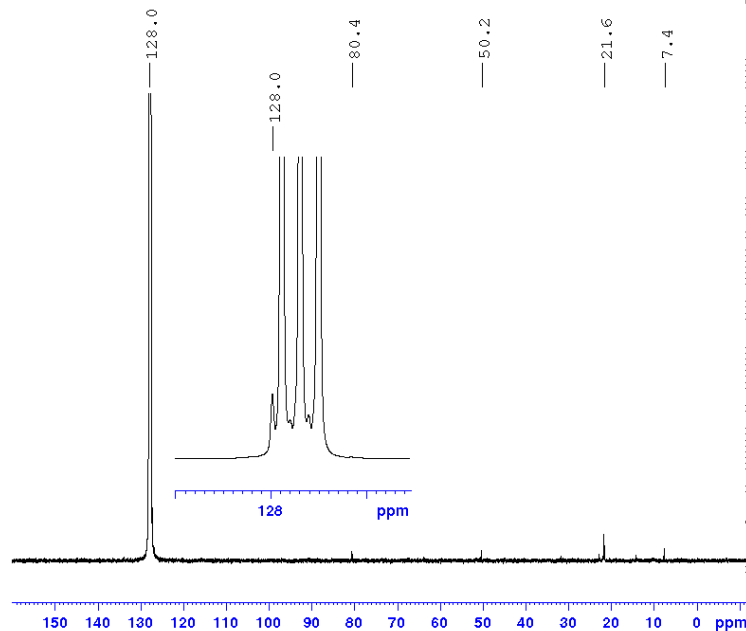

Figure S38.  $^{13}\text{C}\{^1\text{H}\}$  NMR spectra of **5** in  $\text{C}_6\text{D}_6$  at 298 K.

## Crystallographic Details

The crystal data of **4** and **5** was collected on a Bruker D8 VENTURE diffractometer with graphite monochromated  $\text{MoK}\alpha$  radiation ( $\lambda = 0.71073 \text{ \AA}$ ). Data reduction, scaling and absorption corrections were performed using SAINT (Bruker, V8.38A, 2013). The structure was solved with the XT structure solution program using the Intrinsic Phasing solution method<sup>4</sup> and by using Olex2<sup>5</sup> as the graphical interface. The model was refined with the ShelXL program<sup>6</sup> using Least Squares minimization. All non-hydrogen atoms were refined anisotropically. Hydrogen atoms were included in structure factor calculations. All hydrogen atoms were assigned to idealized geometric positions.

The crystal data of **2a** and **3a** were collected on a Rigaku XtaLAB Synergy-R diffractometer with a HPA area detector and multi-layer mirror monochromated  $\text{CuK}\alpha$  radiation. The structure was solved using intrinsic phasing method<sup>4</sup>, refined with the ShelXL program<sup>6</sup> and expanded using Fourier techniques.

The X-ray crystal structures have been deposited in the Cambridge Crystallographic Data Centre (CCDC) CODE. The data can be obtained free of charge from the CCDC ([www.ccdc.cam.ac.uk/data\\_request/cif](http://www.ccdc.cam.ac.uk/data_request/cif)). Details of the data collection and refinement for complexes **2–5** are given in Table S1-S5.

| <b>Table S1. Crystal data and structure refinement for 2a.</b> |                                                                                |
|----------------------------------------------------------------|--------------------------------------------------------------------------------|
| Identification code                                            | 2359952                                                                        |
| Empirical formula                                              | C <sub>44</sub> H <sub>70</sub> B <sub>42</sub> P <sub>2</sub> Br <sub>2</sub> |
| Formula weight                                                 | 1274.78                                                                        |
| Temperature/K                                                  | 100(2)                                                                         |
| Crystal system                                                 | monoclinic                                                                     |
| Space group                                                    | C2/c                                                                           |
| a/Å                                                            | 22.582(5)                                                                      |
| b/Å                                                            | 18.782(3)                                                                      |
| c/Å                                                            | 16.656(6)                                                                      |
| α/°                                                            | 90                                                                             |
| β/°                                                            | 117.637(12)                                                                    |
| γ/°                                                            | 90                                                                             |
| Volume/Å <sup>3</sup>                                          | 6258(3)                                                                        |
| Z                                                              | 4                                                                              |
| ρ <sub>calc</sub> /cm <sup>3</sup>                             | 1.353                                                                          |
| μ/mm <sup>-1</sup>                                             | 1.384                                                                          |
| F(000)                                                         | 2576.0                                                                         |
| Crystal size/mm <sup>3</sup>                                   | 0.358 × 0.238 × 0.171                                                          |
| Radiation                                                      | MoKα (λ = 0.71073)                                                             |
| 2θ range for data collection/°                                 | 4.656 to 52.742                                                                |
| Index ranges                                                   | -28 ≤ h ≤ 24, 0 ≤ k ≤ 23, 0 ≤ l ≤ 20                                           |
| Reflections collected                                          | 6413                                                                           |
| Independent reflections                                        | 6413                                                                           |
| Data/restraints/parameters                                     | 6413/0/407                                                                     |
| Goodness-of-fit on F <sup>2</sup>                              | 1.055                                                                          |
| Final R indexes [I ≥ 2σ (I)]                                   | R <sub>1</sub> = 0.0288, wR <sub>2</sub> = 0.0728                              |
| Final R indexes [all data]                                     | R <sub>1</sub> = 0.0319, wR <sub>2</sub> = 0.0750                              |
| Largest diff. peak/hole / e Å <sup>-3</sup>                    | 0.34/-0.34                                                                     |

| <b>Table S2. Crystal data and structure refinement for 3a.</b> |                                                               |
|----------------------------------------------------------------|---------------------------------------------------------------|
| Identification code                                            | 2359953                                                       |
| Empirical formula                                              | C <sub>14</sub> H <sub>31</sub> B <sub>21</sub> BrN           |
| Formula weight                                                 | 520.32                                                        |
| Temperature/K                                                  | 100(2)                                                        |
| Crystal system                                                 | triclinic                                                     |
| Space group                                                    | P-1                                                           |
| a/Å                                                            | 7.324(2)                                                      |
| b/Å                                                            | 12.901(4)                                                     |
| c/Å                                                            | 14.453(3)                                                     |
| α/°                                                            | 76.495(14)                                                    |
| β/°                                                            | 85.066(14)                                                    |
| γ/°                                                            | 89.27(2)                                                      |
| Volume/Å <sup>3</sup>                                          | 1323.0(6)                                                     |
| Z                                                              | 2                                                             |
| ρ <sub>calc</sub> /cm <sup>3</sup>                             | 1.306                                                         |
| μ/mm <sup>-1</sup>                                             | 1.563                                                         |
| F(000)                                                         | 524.0                                                         |
| Crystal size/mm <sup>3</sup>                                   | 0.24 × 0.23 × 0.12                                            |
| Radiation                                                      | MoKα (λ = 0.71073)                                            |
| 2θ range for data collection/°                                 | 4.84 to 54.206                                                |
| Index ranges                                                   | -9 ≤ h ≤ 9, -16 ≤ k ≤ 16, -18 ≤ l ≤ 18                        |
| Reflections collected                                          | 17106                                                         |
| Independent reflections                                        | 5809 [R <sub>int</sub> = 0.0471, R <sub>sigma</sub> = 0.0507] |
| Data/restraints/parameters                                     | 5809/0/337                                                    |
| Goodness-of-fit on F <sup>2</sup>                              | 1.029                                                         |
| Final R indexes [I ≥ 2σ (I)]                                   | R <sub>1</sub> = 0.0342, wR <sub>2</sub> = 0.0819             |
| Final R indexes [all data]                                     | R <sub>1</sub> = 0.0416, wR <sub>2</sub> = 0.0859             |
| Largest diff. peak/hole / e Å <sup>-3</sup>                    | 0.37/-0.32                                                    |

| <b>Table S3.</b> Crystal data and structure refinement for <b>4•(C<sub>7</sub>H<sub>8</sub>)</b> . |                                                                |
|----------------------------------------------------------------------------------------------------|----------------------------------------------------------------|
| Identification code                                                                                | 2359954                                                        |
| Empirical formula                                                                                  | C <sub>37</sub> H <sub>86</sub> B <sub>42</sub> N <sub>4</sub> |
| Formula weight                                                                                     | 1041.740                                                       |
| Temperature/K                                                                                      | 100.15                                                         |
| Crystal system                                                                                     | triclinic                                                      |
| Space group                                                                                        | P-1                                                            |
| a/Å                                                                                                | 10.4445(3)                                                     |
| b/Å                                                                                                | 11.4808(4)                                                     |
| c/Å                                                                                                | 14.0816(5)                                                     |
| α/°                                                                                                | 67.709(3)                                                      |
| β/°                                                                                                | 86.457(3)                                                      |
| γ/°                                                                                                | 76.241(3)                                                      |
| Volume/Å <sup>3</sup>                                                                              | 1516.76(10)                                                    |
| Z                                                                                                  | 1                                                              |
| ρ <sub>calc</sub> /g/cm <sup>3</sup>                                                               | 1.140                                                          |
| μ/mm <sup>-1</sup>                                                                                 | 0.384                                                          |
| F(000)                                                                                             | 547.2                                                          |
| Crystal size/mm <sup>3</sup>                                                                       | 0.142 × 0.121 × 0.089                                          |
| Radiation                                                                                          | Cu Kα (λ = 1.54184)                                            |
| 2θ range for data collection/°                                                                     | 6.78 to 149.72                                                 |
| Index ranges                                                                                       | -13 ≤ h ≤ 12, -14 ≤ k ≤ 14, -17 ≤ l ≤ 13                       |
| Reflections collected                                                                              | 29929                                                          |
| Independent reflections                                                                            | 5998 [R <sub>int</sub> = 0.0663, R <sub>sigma</sub> = 0.0396]  |
| Data/restraints/parameters                                                                         | 5998/0/361                                                     |
| Goodness-of-fit on F <sup>2</sup>                                                                  | 1.003                                                          |
| Final R indexes [I >= 2σ (I)]                                                                      | R <sub>1</sub> = 0.0751, wR <sub>2</sub> = 0.2109              |
| Final R indexes [all data]                                                                         | R <sub>1</sub> = 0.0883, wR <sub>2</sub> = 0.2273              |
| Largest diff. peak/hole / e Å <sup>-3</sup>                                                        | 0.59/-0.40                                                     |

| <b>Table S4.</b> Crystal data and structure refinement for <b>5</b> . |                                                                                   |
|-----------------------------------------------------------------------|-----------------------------------------------------------------------------------|
| Identification code                                                   | 2359955                                                                           |
| Empirical formula                                                     | C <sub>19</sub> H <sub>60</sub> B <sub>42</sub> Br <sub>1.34</sub> N <sub>2</sub> |
| Formula weight                                                        | 878.19                                                                            |
| Temperature/K                                                         | 100                                                                               |
| Crystal system                                                        | monoclinic                                                                        |
| Space group                                                           | P21/c                                                                             |
| a/Å                                                                   | 12.3887(13)                                                                       |
| b/Å                                                                   | 12.963(2)                                                                         |
| c/Å                                                                   | 29.552(3)                                                                         |
| α/°                                                                   | 90                                                                                |
| β/°                                                                   | 92.692(5)                                                                         |
| γ/°                                                                   | 90                                                                                |
| Volume/Å <sup>3</sup>                                                 | 4740.5(10)                                                                        |
| Z                                                                     | 4                                                                                 |
| ρ <sub>calc</sub> /cm <sup>3</sup>                                    | 1.230                                                                             |
| μ/mm <sup>-1</sup>                                                    | 1.183                                                                             |
| F(000)                                                                | 1780.0                                                                            |
| Crystal size/mm <sup>3</sup>                                          | 0.2 × 0.2 × 0.1                                                                   |
| Radiation                                                             | MoKα (λ = 0.71073)                                                                |
| 2θ range for data collection/°                                        | 4.182 to 52.896                                                                   |
| Index ranges                                                          | -15 ≤ h ≤ 15, -16 ≤ k ≤ 16, -37 ≤ l ≤ 36                                          |
| Reflections collected                                                 | 129764                                                                            |
| Independent reflections                                               | 9751 [Rint = 0.0943, Rsigma = 0.0403]                                             |
| Data/restraints/parameters                                            | 9751/0/594                                                                        |
| Goodness-of-fit on F <sup>2</sup>                                     | 1.043                                                                             |
| Final R indexes [I ≥ 2σ (I)]                                          | R1 = 0.0371, wR2 = 0.0954                                                         |
| Final R indexes [all data]                                            | R1 = 0.0517, wR2 = 0.1043                                                         |
| Largest diff. peak/hole / e Å <sup>-3</sup>                           | 0.39/-0.26                                                                        |

## Reference

- 1 C. Zhang, J. Wang, Z. Lin, Q. Ye, *Inorg. Chem.* **2022**, *61*, 18275–18284.
- 2 S. J. Ryan, S. D. Schimler, D. C. Bland, M. S. Sanford, *Org. Lett.* **2015**, *17*, 1866-1869.
- 3 M. A. Kinzhalov, A. A. Zolotarev and V. P. Boyarskiy, *J. Struct. Chem.* **2016**, *57*, 822–825.
- 4 G. M. Sheldrick, SHELXT - Integrated space-group and crystal-structure determination. *Acta Cryst. A* **2015**, *71*, 3–8.
- 5 O. V. Dolomanov, L. J. Bourhis, R. J. Gildea, J. A. K. Howard, H. Puschmann, OLEX2: a complete structure solution, refinement and analysis program. *J. Appl. Cryst.* **2009**, *42*, 339–341.
- 6 G. M. Sheldrick, A short history of SHELX. *Acta Cryst. A* **2008**, *64*, 112-122.
